1     **Identification of candidate susceptibility genes to *Puccinia graminis* f.**  
2                                    ***sp. tritici* in wheat**

3     **Eva C. Henningsen<sup>1</sup>, Vahid Omidvar<sup>1</sup>, Rafael Della Coletta<sup>2</sup>, Jean-Michel Michno<sup>3</sup>, Erin**  
4     **Gilbert<sup>1</sup>, Feng Li<sup>1</sup>, Marisa E. Miller<sup>1,#a</sup>, Chad L. Myers<sup>3,4</sup>, Sean P. Gordon<sup>5,#b</sup>, John P. Vogel<sup>5,6</sup>,**  
5     **Brian J. Steffenson<sup>1</sup>, Shahryar F. Kianian<sup>1,7</sup>, Cory D. Hirsch\*<sup>1</sup>, Melania Figueroa\*<sup>8</sup>**

6     <sup>1</sup>Department of Plant Pathology, University of Minnesota, St. Paul, MN, USA

7     <sup>2</sup>Department of Agronomy and Plant Genetics, University of Minnesota, St. Paul, MN, USA

8     <sup>3</sup>Bioinformatics and Computational Biology Graduate Program, University of Minnesota,  
9     Minneapolis, MN, USA

10    <sup>4</sup>Department of Computer Science and Engineering, University of Minnesota, Minneapolis, MN,  
11    USA

12    <sup>5</sup>Joint Genome Institute, Walnut Creek, CA, USA

13    <sup>6</sup>Department of Plant and Microbial Biology, University of California, Berkeley, CA, USA

14    <sup>7</sup>USDA-ARS Cereal Disease Laboratory, St. Paul, MN, USA

15    <sup>8</sup>Commonwealth Scientific and Industrial Research Organisation, Agriculture and Food, Canberra,  
16    ACT, Australia

17

18    Present Address:

19    #a Pairwise Plants, LLC. 807 East Main Street, Suite 4-100, Durham, NC 27701

20    #b Roche, Albany, CA, USA

21    \* **Correspondence:**

22    Cory D. Hirsch

23    cdhirsch@umn.edu

24    Melania Figueroa

25    [melania.figueroa@csiro.au](mailto:melania.figueroa@csiro.au)

26

## Wheat stem rust susceptibility

### 27 **Abstract**

28 Wheat stem rust disease caused by *Puccinia graminis* f. sp. *tritici* (*Pgt*) is a global threat to wheat  
29 production. Fast evolving populations of *Pgt* limit the efficacy of plant genetic resistance and constrain  
30 disease management strategies. Understanding molecular mechanisms that lead to rust infection and  
31 disease susceptibility could deliver novel strategies to deploy crop resistance through genetic loss of  
32 disease susceptibility. We used comparative transcriptome-based and orthology-guided approaches to  
33 characterize gene expression changes associated with *Pgt* infection in susceptible and resistant *Triticum*  
34 *aestivum* genotypes as well as the non-host *Brachypodium distachyon*. We targeted our analysis to  
35 genes with differential expression in *T. aestivum* and genes suppressed or not affected in *B. distachyon*  
36 and report several processes potentially linked to susceptibility to *Pgt*, such as cell death suppression  
37 and impairment of photosynthesis. We complemented our approach with a gene co-expression network  
38 analysis to identify wheat targets to deliver resistance to *Pgt* through removal or modification of  
39 putative susceptibility genes.

40

41 **Keywords:** susceptibility, rust, wheat, non-host, transcription, co-expression

42

## 43 1 Introduction

44 Stem rust caused by *Puccinia graminis* f. sp. *tritici* (*Pgt*) is one of the most devastating foliar diseases  
45 of wheat (*Triticum aestivum*) and barley (*Hordeum vulgare*). The economic relevance of this pathogen  
46 to food security is demonstrated by the impact of historical and recent epidemics (Singh et al., 2015;  
47 Pretorius et al., 2000; Olivera et al., 2015; Steffenson et al., 2017; Bhattacharya, 2017; Peterson, 2001).  
48 Consistent with its biotrophic lifestyle, *Pgt* develops an intricate relationship with its host in order to  
49 acquire nutrients and survive. Early stages of infection involve the germination of urediniospores  
50 (asexual spores) and host penetration through the formation of appressoria over stomata (Staples and  
51 Macko, 1984). As the fungus reaches the mesophyll cavity of the plant, it develops infection hyphae  
52 which penetrate plant cell walls and differentiate into specialized feeding structures, known as  
53 haustoria. Haustorial development takes place during the first 24 hours post-infection and is critical for  
54 colony establishment and sporulation that re-initiates the infection cycle (Harder and Chong, 1984).  
55 Similar to other plant pathogens, cereal rust infections involve the translocation of effectors to the plant  
56 cell as a mechanism to shut down basal defenses activated by PAMP triggered immunity (PTI) and  
57 manipulate host metabolism (Couto and Zipfel, 2016; Dodds and Rathjen, 2010). In rust fungi, the  
58 haustorium mediates the secretion of effectors, although the underlying molecular mechanism that  
59 facilitates this process is not known (Petre et al., 2014; Garnica et al., 2014). The plant targets of  
60 effectors and other plant genes that mediate compatibility and facilitate pathogen infection are often  
61 regarded as susceptibility (*S*) genes (van Schie and Takken, 2014; Lapin and Van den Ackerveken,  
62 2013; Lo Presti et al., 2015).

63  
64 To avoid infection by adapted pathogens, plants employ effector-triggered immunity (ETI) which is  
65 mediated by the recognition of effectors by nucleotide-binding domain leucine-rich repeat (NLR)  
66 receptors (Petre et al., 2014; Garnica et al., 2014; Dodds and Rathjen, 2010; Flor et al., 1971). These  
67 specific recognition events often induce localized cell death at infection sites (hypersensitive response,  
68 HR) which restrict pathogen growth. In wheat-rust interactions, ETI is manifested by the reduction or  
69 absence of fungal growth and sporulation (Periyannan et al, 2017). The use of NLR genes to provide  
70 crop protection was a critical component of the Green Revolution which diminished the impact of stem  
71 rust epidemics (Ellis et al., 2014). While this approach still contributes to the development of wheat  
72 cultivars with genetic resistance to stem rust, the durability of such resistant cultivars is hampered by  
73 the evolution of rust populations to avoid recognition by NLRs. Given the economic and environmental  
74 advantages of genetic disease control over chemical applications, the identification of alternative

## Wheat stem rust susceptibility

75 genetic sources of resistance are a priority for securing future wheat production. In this context, the  
76 discovery of *S* genes could have important translational applications for agriculture and potential  
77 durable disease control. Mutations in *S* genes, although often recessive, could shift a genotype to a non-  
78 suitable host due to alterations in initial recognition stages or loss of pathogen establishment  
79 requirements (van Schie and Takken, 2014; Lo Presti et al., 2015).

80  
81 The genetic factors that contribute to wheat susceptibility to biotrophic pathogens such as rust fungi  
82 remain largely unknown. Numerous structural and physiological alterations have been observed in  
83 wheat-rust compatible interactions. At early infection stages, 4-6 days post-inoculation (dpi), the  
84 cytoplasm of infected mesophyll cells increases in volume and an extensive network of the  
85 endoplasmic reticulum is built near the haustorium (Bushnell, 1984). The nucleus of infected cells also  
86 increases in size and migrates towards the haustorium, and in some cases both structures appear in  
87 proximity. These observations suggest that plant cells undergo a massive transcriptional  
88 reprogramming to either accommodate rust colonization or initiate a cascade of plant defenses to  
89 prevent infection. In addition, many biotrophs are known to increase the ploidy of host cell nuclei near  
90 infection sites (Wildermuth, 2010). Advances in next generation sequencing and data mining bring  
91 new opportunities to deepen our understanding of plant-pathogen interactions and the relationship  
92 between plant metabolism and disease resistance or susceptibility. Several transcriptome profiling  
93 studies comparing compatible and incompatible wheat-rust interactions provide strong evidence for  
94 the complexity of these interactions (Bozkurt et al., 2010; Dobon et al., 2016; Chandra et al., 2016;  
95 Zhang et al., 2014; Yadav et al., 2016). Although *S* genes in rust pathosystems are largely unknown,  
96 several susceptibility factors to other plant pathogenic fungi have been identified in *Arabidopsis*  
97 *thaliana*, *Hordeum vulgare* (barley), and solanaceous plants (van Schie and Takken, 2014; Zaidi et al.,  
98 2018).

99 To expand our knowledge of wheat-rust interactions and identify candidate *S* genes to direct future  
100 functional studies, we conducted a comparative RNA-seq analysis of the molecular responses to *Pgt*  
101 in compatible and incompatible interactions. We included a susceptible genotype (W2691) of *Triticum*  
102 *aestivum* (bread wheat) and the same genotype containing the resistance gene *Sr9b*, which confers race-  
103 specific responses to various *Pgt* isolates (McIntosh et al., 1995). We also included the related grass  
104 species *Brachypodium distachyon*, which is recognized as a non-host to various cereal rust species  
105 (Kellogg, 2001; Figueroa et al., 2013, 2015; Ayliffe et al., 2013; Omidvar et al., 2018; Gilbert et al.,  
106 2018; Bettgenhaeuser et al., 2018, 2014). As part of our analysis, we examined the expression profiles

## Wheat stem rust susceptibility

107 of *T. aestivum* and *B. distachyon* orthologs of several known *S* genes in *Arabidopsis thaliana*, *H.*  
108 *vulgare*, as well as other characterized *S* genes in *T. aestivum*, and identified groups of genes co-  
109 regulated with these *S* gene candidates. In conclusion, this study provides an overview of global  
110 expression changes associated with failure or progression of *Pgt* infection in *T. aestivum* and *B.*  
111 *distachyon* and insights into the molecular processes that define disease incompatibility.

## 112 2 Materials and Methods

### 113 2.1 Plant and fungal materials

114 Two near-isogenic lines of *T. aestivum*, W2691 (Luig and Watson, 1972) and W2691 carrying the *Sr9b*  
115 gene (referred to onward as W2691+*Sr9b*, U.S. National Plant Germplasm System Accession  
116 Identifier: CI 17386) and the *B. distachyon* Bd21-3 inbred line (Vogel and Hill, 2008) were used in  
117 this study. *T. aestivum* and *B. distachyon* seeds were received from the USDA-ARS Cereal Disease  
118 Laboratory (CDL) St. Paul, MN, USA and the USDA-ARS Plant Science Unit, St. Paul, MN, USA,  
119 respectively. The fungal isolate *Puccinia graminis* f. sp. *tritici* (*Pgt*) (isolate # CDL 75-36-700-3 race  
120 SCCL) (Duplessis et al., 2011) was obtained from the USDA-ARS CDL.

### 121 2.2 *Pgt* infection of *T. aestivum* and *B. distachyon* genotypes

122 *B. distachyon* seeds were placed in petri dishes with wet grade 413 filter paper (VWR International) at  
123 4°C for five days and germinated at room temperature for three days before sowing to synchronize  
124 growth with wheat plants which did not require stratification. Seeds of both wheat and *B. distachyon*  
125 were sown in Fafard® Germination Mix soil (Sun Gro Horticulture, Agawam, MA, U.S.A.). All plants  
126 were grown in growth chambers with a 18/6 hour light/dark cycle at 21/18°C light/dark and 50%  
127 relative humidity. Urediniospores of *Pgt* were activated by heat-shock treatment at 45°C for 15 minutes  
128 and suspended in Isopar M oil (ExxonMobil) at 10 mg/mL concentration. Inoculation treatments  
129 consisted of 50 µl of spore suspension per plant, whereas mock treatments consisted of 50 µl of oil per  
130 plant. Fungal and mock inoculations were conducted on seven-day old wheat plants (first-leaf stage)  
131 and twelve-day old *B. distachyon* plants (three-leaf stage). After inoculations, plants were kept for 12  
132 hours in mist chambers with repeated misting for 2 minutes every 30 minutes and returned to growth  
133 chambers under the previously described conditions.

### 134 2.3 Analysis of fungal colonization and growth

## Wheat stem rust susceptibility

135 At 2, 4, and 6 dpi *T. aestivum* and *B. distachyon* leaves were sampled and cut into 1 cm sections before  
136 staining with Wheat Germ Agglutinin Alex Fluor® 488 conjugate (WGA-FITC; ThermoFisher  
137 Scientific) following previously described procedures (Omidvar et al., 2018). Time points to represent  
138 stages of *Pgt* infection were selected based on previous characterization (Figuroa et al., 2013;  
139 Figuroa et al., 2015). To determine the level of fungal colonization, the percentage of urediniospores  
140 that germinated (GS), formed an appressorium (AP), established a colony (C), and differentiated a  
141 sporulating colony (SC) were visualized using a fluorescence microscope (Leica model DMLB; 450-  
142 490 nM excitation). The progression of fungal growth was recorded for 100 infection sites for each of  
143 the three biological replicates. Genomic DNA was extracted from *T. aestivum* (three infected primary  
144 leaves) and *B. distachyon* (three infected secondary leaves) using the DNeasy Plant Mini Kit (Qiagen)  
145 and were standardized to a 10 ng/μl concentration. The ITS regions were amplified by qPCR using  
146 ITS-specific primers provided by the Femto™ Fungal DNA Quantification Kit (Zymo Research) to  
147 quantify the relative abundance of fungal DNA following the manufacturer's recommendations for the  
148 three biological replicates. The *GAPDH* housekeeping gene from each species was used as an internal  
149 control to normalize fungal DNA quantities (Omidvar et al., 2018).

### 150 **2.4 RNA isolation, purification, and sequencing**

151 Infected and mock treated primary leaves from W2691 and W2691+*Sr9b* and secondary leaves from  
152 Bd21-3 were collected at 2, 4, and 6 dpi. For each of the three biological replicates, three infected  
153 leaves were pooled for RNA extraction using the RNeasy Plant Mini Kit (Qiagen). Subsequently,  
154 stranded-RNA libraries were constructed, and 125 bp paired-end reads were sequenced on an Illumina  
155 HiSeq™ 2500 instrument at the University of Minnesota Genomics Center. On average, more than 10  
156 million reads were generated per time point in each of the previously listed plant-rust interactions  
157 (**Table S1**).

### 158 **2.5 Alignment of reads to the *T. aestivum* and *B. distachyon* reference genomes**

159 Short reads and low-quality bases were trimmed using cutadapt v1.18 (Martin, 2011) with the  
160 following parameters: minimum-length 40, quality-cutoff 30, and quality-base=33. Subsequently,  
161 W2691 and W2691+*Sr9b* reads were mapped to the *T. aestivum* cv. Chinese Spring reference genome  
162 IWGSC RefSeq v1.0 (Alaux et al., 2018) and Bd21-3 reads were mapped to the Bd21-3 reference  
163 genome from the Joint Genome Institute (*B. distachyon* Bd21-3 v1.1 DOE-JGI,  
164 <http://phytozome.jgi.doe.gov/>). Read mapping was conducted using STAR v2.5.3 (Dobin et al., 2012)

## Wheat stem rust susceptibility

165 set for two-pass mapping mode with the following parameters: twopassMode Basic and  
166 outSAMmapqUnique 20.

### 167 2.6 Expression profiling and identification of differentially expressed genes

168 Reads were mapped to *T. aestivum* and *B. distachyon* gene features using htseq v.0.11.0 to obtain count  
169 values (Anders et al., 2015). Normalized read counts and differential expression (DE) analysis were  
170 performed with DESeq2 v1.28.1 (Love et al., 2014). Genes with a  $|\log_2$  fold change  $\geq 1.5$  and a  $p$ -  
171 value  $< 0.05$  were identified as differentially expressed genes (DEGs).

### 172 2.7 Gene ontology analysis

173 Gene ontology (GO) terms were obtained from GOMAP track data for *T. aestivum* (Alaux et al., 2018)  
174 and previously published data for *B. distachyon* (*Brachypodium distachyon* Bd21-3 v1.2 DOE-JGI,  
175 <http://phytozome.jgi.doe.gov/>) annotation files. GO terms in wheat and *B. distachyon* were mapped to  
176 the GOslim plant subset using OWLTools with the command owltools --map2slim  
177 (<https://github.com/owlcollab/owltools>). GO enrichment analysis for DEGs was performed using the  
178 topGO R package using the “weight01” algorithm and fisher test statistic (Alexa and Rahnenfuhrer,  
179 2020). Enriched terms were considered significant with a Fisher test  $p$ -value  $< 0.01$  (**Table S2**).  
180 Enrichment analyses using the GOslim subset were performed on all differentially expressed wheat  
181 and *B. distachyon* genes, as well as on genes within the *S*-gene orthologs clusters. Enrichment analysis  
182 with the full GO set was only performed on the differentially expressed *T. aestivum* and *B. distachyon*  
183 genes using the same methods described above.

### 184 2.8 Orthology analysis

185 Protein sequences from *S* genes of interest (**Table S3**) as cited in original publications as reviewed by  
186 van Schie and Takken (2014) were cross-checked using gene name and synonym information and the  
187 Basic Local Alignment Search Tool (BLAST) functions in the TAIR gene search database  
188 (<https://www.arabidopsis.org/index.jsp>), EnsemblPlants (<https://plants.ensembl.org/index.html>),  
189 UniProt (<https://www.uniprot.org/>), and the IPK blast server ([https://webblast.ipk-  
190 gatersleben.de/barley\\_ibsc/](https://webblast.ipk-gatersleben.de/barley_ibsc/)). OrthoFinder version 2.4.0 (Emms and Kelly, 2019) was used to identify  
191 orthologs between *A. thaliana*  
192 ([https://phytozome.jgi.doe.gov/pz/portal.html#!info?alias=Org\\_Athaliana](https://phytozome.jgi.doe.gov/pz/portal.html#!info?alias=Org_Athaliana)), *H. vulgare*  
193 ([7](http://floresta.eead.csic.es/rsat/data/genomes/Hordeum_vulgare.IBSCv2.36/genome/Hordeum_vulga</a></p></div><div data-bbox=)



## Wheat stem rust susceptibility

194 re.IBSCv2.36.pep.all.fa), *T. aestivum* (annotation version 1.1  
195 [https://urgi.versailles.inra.fr/download/iwgsc/IWGSC\\_RefSeq\\_Annotations/v1.1/iwgsc\\_refseqv1.1\\_g](https://urgi.versailles.inra.fr/download/iwgsc/IWGSC_RefSeq_Annotations/v1.1/iwgsc_refseqv1.1_genes_2017July06.zip)  
196 [enes\\_2017July06.zip](https://urgi.versailles.inra.fr/download/iwgsc/IWGSC_RefSeq_Annotations/v1.1/iwgsc_refseqv1.1_genes_2017July06.zip)), and *B. distachyon* (annotation version 1.2 [https://phytozome-](https://phytozome-next.jgi.doe.gov/info/BdistachyonBd21_3_v1_2)  
197 [next.jgi.doe.gov/info/BdistachyonBd21\\_3\\_v1\\_2](https://phytozome-next.jgi.doe.gov/info/BdistachyonBd21_3_v1_2)) proteins. For genes in *A. thaliana*, *H. vulgare*, and *T.*  
198 *aestivum* with multiple isoforms, perl scripts for each species were used to retain only the longest  
199 representative transcript for use in the orthology analysis  
200 ([https://github.com/henni164/stem\\_rust\\_susceptibility/longest\\_transcript/perl](https://github.com/henni164/stem_rust_susceptibility/longest_transcript/perl)). The longest transcript  
201 file for *B. distachyon* (BdistachyonBd21\_3\_537\_v1.2.protein\_primaryTranscriptOnly.fa) was  
202 obtained from Phytozome. The default settings of OrthoFinder were used, and orthologs of the four  
203 species were obtained in a single run. The URGI BLAST tool ([https://wheat-urgi.versailles.inra.fr/Seq-](https://wheat-urgi.versailles.inra.fr/Seq-Repository/BLAST)  
204 [Repository/BLAST](https://wheat-urgi.versailles.inra.fr/Seq-Repository/BLAST)) was used to identify candidates for missing subgenome representatives.

### 205 **2.9 Protein sequence phylogenetic analysis**

206 Using the longest protein sequence from known *S* genes in *A. thaliana* (Lamesch et al., 2011) and *H.*  
207 *vulgare* (Howe et al., 2019), as well as the longest protein sequences from the orthologous candidate *S*  
208 genes in *T. aestivum* and *B. distachyon* (**Table S3**), phylogenetic trees were constructed to examine the  
209 relationship of ortholog families using the web-based tool NGPhylogeny (Lemoine et al., 2019).  
210 Default parameters for the FastME one-click workflow were used for MAFFT alignment, BMGE  
211 curation, and FASTME tree inference (<https://ngphylogeny.fr/documentation>). A R script using the  
212 packages ggplot2, ggtree, and ape was used to generate visualizations of the generated phylogenetic  
213 trees (Wickham, 2016; Yu et al., 2017; Paradis and Schliep, 2018).

### 214 **2.10 Gene co-expression network analysis**

215 Individual gene co-expression networks (GCNs) were constructed and analyzed for *T. aestivum*  
216 W2691, W2691+*Sr9b* and *B. distachyon* Bd21-3 genotypes using the python package Camoco  
217 (Schaefer et al., 2018). To build each network, all three independent RNA-seq replicates from all three  
218 time points (2, 4, and 6 dpi) of infected and mock-inoculated treatments were used. HTSeq read counts  
219 were converted to FPKM values for Camoco compatibility, and subjected to inverse hyperbolic sine  
220 transformation normalized against median FPKMs across all samples. Genes with coefficient of  
221 variation < 0.1 across all samples or without a single sample having an expression above 0.5 FPKM  
222 were removed from analysis. Additionally, genes with a FPKM value > 0.001 across 60% of samples  
223 were included in network analyses. Pearson correlation metrics between all gene pairs were calculated



## Wheat stem rust susceptibility

224 and subjected to Fisher transformation to generate Z-scores with a cutoff of  $Z \geq 3$  to allow  
225 comparisons between networks (Huttenhower et al., 2006). Finally, correlation metrics were used to  
226 build weighted gene co-expression networks. Clusters containing susceptibility gene orthologs were  
227 visualized using ggplot2 (Wickham, 2016), ggnetwork (Briatte, 2020), sna (Butts, 2019), and network  
228 (Butts, 2015) R packages.

### 229 2.11 Data availability

230 Sequence data was deposited in NCBI under BioProject PRJNA483957 (**Table S1**). Unless specified  
231 otherwise, supplemental tables, scripts and files for analysis and visualizations are available at  
232 [https://github.com/henni164/stem\\_rust\\_susceptibility](https://github.com/henni164/stem_rust_susceptibility).

233

## 234 3 Results

### 235 3.1 *T. aestivum* and *B. distachyon* differ in susceptibility to *Pgt*

236 We compared the infection and colonization of *Pgt* in two *T. aestivum* isogenic lines that were  
237 susceptible (W2691) or resistant (W2691+*Sr9b*) to *Pgt* as well as in the non-host *B. distachyon* Bd21-  
238 3. Symptom development upon infection was consistent with previous observations reporting  
239 susceptibility of W2691 and W2691+*Sr9b* mediated resistance (intermediate) to race SCCL (**Figure**  
240 **1A, B**) (Zambino et al., 2000). Susceptibility was manifested by formation of large sporulating pustules  
241 in W2691, while small pustules surrounded by a chlorotic halo were characteristic of *Sr9b* mediated-  
242 resistance at 6 days post-inoculation (dpi). Susceptibility differences between W2691 and  
243 W2691+*Sr9b* were evident at 6 dpi as formation of fungal colonies was present in both genotypes, but  
244 colony sizes were larger in W2691 than W2691+*Sr9b* (**Figure 1**). *B. distachyon* supports the formation  
245 of colonies that are smaller than those in the resistant *T. aestivum* line W2691+*Sr9b* with no visible  
246 macroscopic symptoms observed at 6 dpi (**Figure 1C**). To monitor the progression of fungal growth,  
247 we quantified the percentage of germinated urediniospores (GS), and interaction sites displaying the  
248 formation of appressoria (AP), colony formation (C), and colony sporulation (SC) at 2, 4, and 6 dpi  
249 using microscopy (**Figure 1D**). The germination frequency (~95%) was similar between all three  
250 genotypes tested (ANOVA test,  $p > 0.05$ ). The percentage of interaction sites showing appressorium  
251 formation (AP) was higher in wheat than in *B. distachyon* at 4 dpi (ANOVA test,  $p \leq 0.035$ ). The  
252 genotype W2691 displayed the highest percentage of interaction sites showing colony formation at 4  
253 and 6 dpi (ANOVA test,  $p \leq 0.002$ ), and sporulation at 6 dpi (ANOVA test,  $p \leq 0.0015$ ). In contrast, a

## Wheat stem rust susceptibility

254 smaller number of rust colonies formed in *B. distachyon*, and these colonies did not show signs of  
255 sporulation. To estimate rust colonization levels on *T. aestivum* and *B. distachyon*, we quantified the  
256 abundance of fungal DNA in infected leaves at 2, 4, and 6 dpi (**Figure 1E**). Rust colonization among  
257 all genotypes was not significantly different at 2 dpi (ANOVA test,  $p > 0.05$ ); however, there was a  
258 trend at 4 and 6 dpi for higher rust colonization in W2691 than in W2691+*Sr9b* and *B. distachyon*  
259 (ANOVA test,  $p > 0.05$ ).

### 260 3.2 Putative biological processes associated with *in planta* responses to *Pgt*

261 The transcriptome profiles of *T. aestivum* (W2691 and W2691+*Sr9b*) and *B. distachyon* (Bd21-3) in  
262 response to *Pgt* infection at 2, 4, and 6 dpi were examined using RNA-seq expression profiling (**Table**  
263 **S1**). Differential expression analysis was used to compare responses to rust infection relative to the  
264 baseline mock treatments. Overall, the number of differentially expressed genes (DEGs) increased in  
265 W2691, W2691+*Sr9b*, and Bd21-3 over the course of infection (**Table 1**). Between 11-12.9% of *T.*  
266 *aestivum* genes were differentially expressed at 6 dpi, whereas in Bd21-3 only 6.2% were differentially  
267 expressed. We conducted a GOslim enrichment analysis on up- and down-regulated DEGs for each  
268 interaction at the infection time points (**Figure 2**). At 2 dpi, W2691 and W2691+*Sr9b* had only a few  
269 GOslim terms enriched in either up- or down-regulated DEGs. At 4 dpi, greater similarities between  
270 the *T. aestivum* genotypes emerged with very similar enrichment patterns in GOslim terms. The  
271 similarity of GOslim term enrichment continued at 6 dpi, with W2691 and W2691+*Sr9b* having nearly  
272 identical enrichment patterns. W2691+*Sr9b* had one additional term enriched in both up-regulated  
273 (cytoplasm, GO:0005737) and down-regulated (chromatin binding, GO:0003682) genes. Compared to  
274 the two *T. aestivum* genotypes, Bd21-3 had fewer terms enriched across all three timepoints and only  
275 a few terms were in common with W2691 and W2691+*Sr9b* (i.e., extracellular region (GO:0005576),  
276 DNA-binding transcription factor activity (GO:0003700). Bd21-3 had several unique terms in both up-  
277 and down-regulated categories, among them mitochondrion (GO:0005739), transporter activity  
278 (GO:0005215), catalytic activity (GO:0003824), and DNA binding (GO:0003677) were upregulated,  
279 while intracellular (GO:0005622), DNA-binding transcription factor activity (GO:0003700), catalytic  
280 activity (GO:0003824), and DNA binding (GO:0003677) were downregulated. The full GO set also  
281 demonstrated clear differences between the *T. aestivum* genotypes and Bd21-3. Photosynthesis-related  
282 terms such as chloroplast photosystem I and II (GO:0030093 and GO:0030095), photosystem II  
283 antenna complex (GO:0009783), and PSII associated light-harvesting complex II (GO:0009517) were  
284 overrepresented at 4 and 6 dpi in W2691 and W2691+*Sr9b*, but not in Bd21-3 (**Table S2**). In addition,

## Wheat stem rust susceptibility

285 Bd21-3 only had enrichment in 11 terms across the cellular component (CC), biological process (BP),  
286 and molecular function (MF) categories compared to the terms enriched 741 across the three categories  
287 in W2691 and W2691+*Sr9b* (**Table S2**). Overall, this analysis highlights how the molecular and  
288 genetic responses of Bd21-3 to *Pgt* differ from those in W2691 and W2691+*Sr9b* over the course of  
289 the experiment.

### 290 **3.3 Differential regulation of candidate orthologous susceptibility (S) genes in *T. aestivum* and** 291 ***B. distachyon* upon *Pgt* infection.**

292 Various *S* genes have been previously characterized or postulated in several species, including *A.*  
293 *thaliana* and *H. vulgare* (Büschges et al., 1997; Chen et al., 2007; Chen et al., 2010; Low et al., 2020),  
294 and this knowledge has allowed us to further understand molecular plant-microbe interactions. With  
295 an interest in identifying potential *S* genes in *T. aestivum* as well as creating resources to enable future  
296 studies, we designed an experimental workflow based on the identification of known *S* gene orthologs,  
297 gene expression comparisons and co-expression network analysis (**Figure 3**). A curated set of  
298 previously characterized or postulated *S* genes as summarized by Schie and Takken (2014) was  
299 narrowed down by selecting genes in *A. thaliana*, and *H. vulgare*, and eliminating *S* genes that were  
300 discovered or characterized for viruses or necrotrophic fungi, leaving 112 potential candidate *S* genes  
301 to examine (**Table S3**). We then conducted an orthology analysis using all *H. vulgare*, *A. thaliana*, *B.*  
302 *distachyon*, and *T. aestivum* transcripts to identify orthogroups of longest transcript of all genes.  
303 Orthogroups were constructed from 211,973 genes across these species (**Table S3**). A total of 182,206  
304 genes were assigned to 29,420 orthogroups, the largest of which (OG0000000) contained 211 genes.  
305 Of the total genes, 92,913 (86%) wheat, 31,334 *B. distachyon* (80%), 34,075 barley (91%), and 23,883  
306 *A. thaliana* (87%) genes were assigned to orthogroups. We identified 91 of the reported *S* genes from  
307 *A. thaliana* and *H. vulgare* across 70 orthogroups, that also consisted of at least one *T. aestivum* gene  
308 and one *B. distachyon* gene (**Table S4**). These genes from *T. aestivum* and *B. distachyon* were selected  
309 as *S* gene orthologs. A total of 29,767 genes (orthogroup OG0029421 to OG0059187) were assigned  
310 groups with only one member (singleton orthogroups) (**Table S5**).

311  
312 The gene expression patterns of *S* gene orthologs in *T. aestivum* and *B. distachyon* were used to identify  
313 which orthologs may act as susceptibility factors (**Figure 3, Table S6**). The selection criterion was  
314 applied to include DEGs that showed a progressive increase in log<sub>2</sub> fold change (mock vs infected,  
315 |log<sub>2</sub> fold change| ≥ 1.5 and a *p*-value < 0.05) in W2691 or in both W2691 and W2691+*Sr9b*, but the  
316 corresponding orthologs in *B. distachyon* and/or W2691+*Sr9b* showed a decrease or no change, as

## Wheat stem rust susceptibility

317 observed in various systems (Chen et al., 2010; Pessina et al., 2014). The assumption is that *S* genes  
318 will be up-regulated during infection when the pathogen reaches the sporulation stage (e.g., in a  
319 susceptible or intermediate resistant host represented by W2691 and W2691+*Sr9b*, respectively) but  
320 with a low or no regulatory change in a non-host (Bd21-3). Expression data for all genes can be found  
321 in **Table S6** in association with orthogroup number. Most genes in the 70 orthogroups did not  
322 demonstrate major changes in expression over the course of the experiment (**Figure S1**), including the  
323 orthogroup OG0001703, which contains the *Mlo* (*Mildew locus O*) alleles and orthologous sequences.  
324 Eight orthogroups that demonstrated these expression patterns were chosen for further analysis; these  
325 included ortholog genes for *AGD2* (*aberrant growth and death 2*), *BI-1* (*BAX inhibitor-1*), *DMR6*  
326 (*downy mildew resistance 6*), *DND1* (*defense, no death*), *FAH1* (*fatty acid hydroxylase 1*), *IBR3* (*IBA*  
327 *response 3*), *VAD1* (*vascular associated death 1*), and *WRKY25* (*WRKY DNA binding protein 25*)  
328 (**Figure 4, Table 2, Table S7**). Among the eight susceptibility orthogroups, *T. aestivum* orthologs of  
329 *BI-1*, *DMR6*, and *WRKY25* showed the greatest increase in fold change (**Table S7**) in either W2691 or  
330 W2691+*Sr9b*, particularly at 6 dpi (**Figure 4**). The gene ortholog of *DND1* displayed a higher fold  
331 change in W2691 than in W2691+*Sr9b*.

332  
333 The phylogenetic relationships of the orthogroups to known *S* genes were confirmed using  
334 NGphylogeny (**Figure S2**). A phylogenetic tree for *DND1* was not generated since the orthogroup  
335 (OG0018857) only contains three genes (TraesCS5D01G404600, BdiBd21-3.1G0110600, and  
336 AT5G15410). Complete sets of *T. aestivum* homeologs from the three subgenomes were found in four  
337 out of the eight examined orthogroups. There were only two of three expected *T. aestivum* homeologs  
338 in the *DMR6* orthogroup, with TraesCS4B02G346900 and TraesCS4D02G341800 representing the B  
339 and D subgenomes, respectively. A tblastn of these sequences to chromosome 4A revealed  
340 TraesCS4A02G319100, a partial match of 30-31% identity (1e-42 to 1e-44). This gene has low  
341 expression and is found in orthogroup OG0006808, which contains two other *T. aestivum* genes, one  
342 *B. distachyon* gene, two *A. thaliana* genes, and one *H. vulgare* gene (**Tables S4 and S6**). Despite the  
343 low sequence similarity, TraesCS4A02G319100 and TraesCS4B02G346900 are at more similar  
344 positions (4A:608043459 and 4B:640532917, respectively) to each other than to  
345 TraesCS4D02G341800 (4D:498572979). A tblastn to the entire genome revealed 20 other matches for  
346 the two *DMR6* orthologs with 31-74% identity. Thus, it does not seem that the *T. aestivum* genome  
347 reference (Chinese Spring) contains a homeolog of *DMR6* in the A genome.

348

## Wheat stem rust susceptibility

349 Another *S* gene orthogroup without full subgenome representation was OG0018857 which contained  
350 *DND1*. This orthogroup only has one *T. aestivum* gene, TraesCS5D02G404600 from subgenome D. A  
351 tblastn to chromosomes 5A and 5B resulted in matches with high identity on both 5A  
352 (TraesCS5A02G395300, 94%, 6e-159) and 5B (89%, 1e-176). TraesCS5A02G395300 is present in  
353 orthogroup OG0048986 as a singleton with low expression in W2691 (FPKM = 2.61) and  
354 W2691+*Sr9b* (FPKM = 1.65), and TraesCS5B02G400100 is included in orthogroup OG0048844 as a  
355 singleton as well with notable expression at 6 dpi in infected W2691 (FPKM = 4.28) and low  
356 expression in W2691+*Sr9b* (FPKM = 1.19) (**Table S5 and S6**). A tblastn to the entire genome  
357 identified 19 other candidates with identity 33-97%. The most notable matches with high identity were  
358 TraesCS7B02G161600 (97%, 4e-152) and TraesCS3B02G306700 (97%, 2e-147), which are the only  
359 two genes together in orthogroup OG0027858. Both top matches had essentially no expression in either  
360 *T. aestivum* genotype (FPKM = 0 to 0.07) (**Table S6**). A third genomic region on chromosome 2B also  
361 has 97% identity, but is annotated as a nested repeat.

362  
363 For *FAH1*, three *T. aestivum* orthologs are present in the orthogroup OG0006155, but one is from  
364 subgenome A (TraesCS5A02G019200) while the other two are from subgenome D  
365 (TraesCS5D02G024600 and TraesCS5D02G424200). A tblastn of all three sequences to chromosome  
366 5B revealed two matches, TraesCS5B02G016700 (87%, 3e-49) and TraesCS5B02G418800 (62/87%,  
367 2e-64/2e-49), while a tblastn to the entire genome uncovered a partial match on 5A  
368 (TraesCS5A02G416500, 46-62%, 7e-68-1e-104) and a partial match on 3D which was not annotated  
369 (68-89%, 6e-34-3e-43). All three annotated genes are in singleton orthogroups  
370 (TraesCS5B02G016700, OG0056228; TraesCS5B02G418800, OG0055841; TraesCS5A02G416500,  
371 OG0057903) and have low expression in both W2691 and W2691+*Sr9b* (FPKM = 0.05 to 1.8) (**Table**  
372 **S5 and S6**). Orthogroup OG0005265 for *AGD2* is similar to the orthogroup for *FAH1*, having one A  
373 subgenome representative (TraesCS4A02G116000) and two D subgenome representatives  
374 (TraesCS4D02G189600 and TraesCS7D02G452900). The tblastn of these sequences to chromosome  
375 4B revealed one possible match with two annotations in the same location (61-62%, 9e-108-1e-113),  
376 TraesCS4B02G264500 on the - strand and TraesCS4B02G264400 on the + strand. The former is a  
377 singleton in orthogroup OG0047603 with low expression in W2691 (FPKM = 0.09) and high  
378 expression in infected W2691+*Sr9b* at 6 dpi (FPKM = 4.64), while the latter is in OG0015484 with  
379 several other genes and is not highly expressed in either *T. aestivum* genotype (FPKM = 1.3 to 1.7)  
380 (**Table S6**). The tblastn to the entire genome revealed several hits of identity varying between 22% and  
381 97%.



### 382 3.4 Gene co-expression network analysis

383 To further explore potential processes and novel genes linked to stem rust susceptibility, a gene co-  
384 expression network for *B. distachyon* and each *T. aestivum* genotype using the mock and infected  
385 RNA-seq data at each timepoint was constructed (**Table S8**). The complete Bd21-3 network has  
386 572,179 edges that connected 21,746 nodes (55.7% of protein-coding genes), while the W2691 and  
387 W2691+*Sr9b* networks are larger (W2691: 3,433,279 edges, 49,082 nodes, 45.6% of protein-coding  
388 genes; W2691+*Sr9b*: 3,817,404 edges, 49,000 nodes, 45.5% of protein-coding genes). The *B.*  
389 *distachyon* network was expected to be smaller as it represents a diploid species with fewer annotated  
390 genes (39,068), while the hexaploid wheat contains more gene annotations (107,891). There are 189  
391 clusters with more than 10 genes in Bd21-3, 258 in W2691, and 391 in W2691+*Sr9b*. Thus, more genes  
392 have similar expression patterns in W2691+*Sr9b* than in W2691, and Bd21-3 has the lowest number  
393 of genes with similar patterns. The eight *S* gene orthogroups of interest are represented by 14 clusters  
394 in W2691 (cluster IDs: 0, 3, 4, 5, 8, 11, 13, 60, 110, 178, 11114, 11235, 12377, 20128), 11 in  
395 W2691+*Sr9b* (cluster IDs: 0, 2, 4, 112, 1139, 1916, 2729, 2772, 3133, 10229, 11079), and 11 in Bd21-  
396 3 (cluster IDs: 3, 4, 35, 51, 272, 513, 652, 1359, 1662, 1848, 3087) (**Table S9**). Some orthogroups are  
397 represented across multiple clusters, while others are only represented in singleton clusters. The  
398 ortholog clusters in *B. distachyon* contain fewer genes than the corresponding W2691 and  
399 W2691+*Sr9b* ortholog clusters.

400  
401 GO enrichment tests using GOslim annotations were conducted on the clusters to investigate functional  
402 processes. Across all eight *S* gene orthogroups, at least one gene from each is in a cluster with GO  
403 enrichment in at least one genotype (**Figure 5**). *DMR6*, *FAH1*, and *WRKY25* are the only candidates  
404 to have enrichment in all three genotypes, *AGD2* and *DND1* only has enrichment in W2691, and *BI-1*,  
405 *IBR3*, and *VADI* have enrichment in both W2691 and W2691+*Sr9b*. Terms commonly enriched in the  
406 *T. aestivum* genotypes include the Golgi apparatus (GO:0005794), endosome (GO:0005768),  
407 endoplasmic reticulum (GO:0005783), protein binding (GO:0005515), transporter activity  
408 (GO:0005215), vacuole (GO:0005773), and peroxisome (GO:0005777) (**Figure 5**). Only one GO term,  
409 catalytic activity (GO:0003824) is unique to Bd21-3, with other terms like DNA-binding transcription  
410 factor activity (GO:0003700) being enriched in the Bd21-3 and *T. aestivum* genotypes.

411  
412 For each genotype a cluster containing one or more orthologs of *DND1*, *VADI*, and *DMR6* was selected  
413 as examples for presentation (**Figure 6**). Selection criteria for these examples included 1) higher



## Wheat stem rust susceptibility

414 expression in infected than in mock treatments in *T. aestivum* and 2) varied cluster sizes across  
415 genotypes. *DND1* is represented by TraesCS5D02G404600 within cluster 4 in the W2691 genotype  
416 (557 genes), by TraesCS5D02G404600 within cluster 122 in the W2691+*Sr9b* genotype (21 genes)  
417 and by BdiBd21-3.1G0110600 within cluster 652 in the Bd21-3 genotype (4 genes) (**Figure 6A, Table**  
418 **S8**). *VAD1* represents a mid-point between *DND1* and *DMR6*, with the large cluster 0  
419 (TraesCS2D02G236800) representing *VAD1* for the W2691 genotype (4527 genes), a singleton cluster  
420 (cluster 3087) for the Bd21-3 genotype (1 gene, BdiBd21-3.1G0357000), and the large cluster 0  
421 (TraesCS2D02G236800) for the W2691+*Sr9b* genotype (3400 genes) (**Figure 6B, Table S8**). *DMR6*  
422 is also represented by cluster 0 (TraesCS4B02G346900 and TraesCS4D02G341800) for both W2691  
423 and W2691+*Sr9b*; however, cluster 4 representing *DMR6* in Bd21-3 (BdiBd21-3.1G1026800) is larger  
424 than in the previous examples (443 genes) (**Figure 6C, Table S8**). In all cases, the *S* gene candidates  
425 are not the most differentially-expressed genes at 6 dpi among the *T. aestivum* genotype clusters; the  
426 most differentially expressed gene at 6 dpi in cluster 0 is TraesCS7A02G157400 (not functionally  
427 annotated) in W2691 ( $\log_2FC = 13.64$ ) and TraesCS1A02G266000 (IPR002921:Fungal lipase-like  
428 domain IPR029058:Alpha/Beta hydrolase fold IPR033556:Phospholipase A1-II) in W2691+*Sr9b*  
429 ( $\log_2FC = 14.61$ ). For cluster 4 in W2691, TraesCS4D02G120200 (IPR001471:AP2/ERF domain  
430 IPR016177:DNA-binding domain superfamily IPR036955:AP2/ERF domain superfamily) is the most  
431 differentially expressed gene at 6 dpi ( $\log_2FC = 12.71$ ), while for cluster 122 in W2691+*Sr9b* it is  
432 TraesCS1A02G276800 (IPR013087:Zinc finger C2H2-type IPR036236:Zinc finger C2H2  
433 superfamily) ( $\log_2FC = 3.83$ ). In *B. distachyon*, BdiBd21-3.1G0110600, which is the Bd21-3 ortholog  
434 to *A. thaliana DND1*, is most differentially expressed in the cluster representing *DND1* and was highly  
435 downregulated in infected tissue at 6 dpi ( $\log_2FC = -0.70$ ). By necessity the most differentially  
436 expressed gene in the network representing *VAD1* in *B. distachyon* is the ortholog of *VAD1*, as Bd21-  
437 3 cluster 3087 is a singleton cluster. The most differentially expressed Bd21-3 gene in cluster 4  
438 representing *DMR6* is BdiBd21-3.2G0466100 ( $\log_2FC = 0.28$ ). This gene is annotated as a Leucine-  
439 rich repeat protein kinase family protein due to homology with the *A. thaliana* gene AT1G79620,  
440 though the orthology analysis places these genes in different clusters (OG0019394 and OG0010938,  
441 respectively). All clusters representing the eight *S* gene candidates are shown in **Figure S3**.

## 442 4 Discussion

443 Susceptibility (*S*) genes are an essential component of compatible plant pathogen interactions  
444 (Engelhardt et al., 2018). The opportunity to genetically manipulate such genes to engineer disease

## Wheat stem rust susceptibility

445 resistance in important crops such as *T. aestivum* has captured significant scientific interest in recent  
446 years. However, our understanding of the genetic basis of disease susceptibility in cereals is limited to  
447 a few examples (van Schie and Takken, 2014; Engelhardt et al., 2018). Thus, important questions  
448 regarding the biological functions of these genes and their activation remain to be answered. As a first  
449 step to uncover putative stem rust *S* genes, we conducted a comparative RNA-seq experiment coupled  
450 with gene co-expression network analysis to determine transcriptional responses in *T. aestivum*  
451 genotypes and *B. distachyon* Bd21-3. We compared a compatible interaction (W2691) with an  
452 incompatible interaction controlled by the race-specific resistance gene *Sr9b* in the same genetic  
453 background (W2691+*Sr9b*). *Sr9b* restricts pathogen growth; however, it also allows the development  
454 of small sporulating colonies of a *Pgt* isolate which belongs to the race SCCL (Zambino et al., 2000).  
455 A more stringent incompatibility scenario is given by Bd21-3 genotype of *B. distachyon*, which allows  
456 restricted colony formation of *Pgt* without sporulation. These observations were consistent with  
457 previous descriptions of *B. distachyon* as a non-host to rust pathogens (Figueroa et al., 2013, 2015,  
458 Omidvar et al., 2018). Thus, a strength of this study is the survey of molecular responses associated  
459 with increasing levels of susceptibility.

460  
461 Consistent with findings from other transcriptomic studies of wheat-rust interactions (Dobon et al.,  
462 2016; Manickavelu et al., 2010; Chandra et al., 2016; Zhang et al., 2014; Yadav et al., 2016), major  
463 transcriptional changes were detected in response to infection in both *T. aestivum* and *B. distachyon*,  
464 which reflect the complexity of these plant-microbe interactions. A significantly higher number of up-  
465 or down-regulated genes were found in *T. aestivum* than *B. distachyon*. The greater fungal colonization  
466 of *T. aestivum* as indicated by *in planta* fungal growth assays of *Pgt* is likely a result of the pathogen's  
467 failure to effectively manipulate the metabolism of *B. distachyon*. GOslim term analyses indicated an  
468 enrichment for Golgi apparatus, peroxisome, vacuole, and cell wall related functions in up-regulated  
469 genes in *T. aestivum*. These results are not surprising as a large proportion of immune receptors and  
470 plant defense signaling components play a role in plant-microbe interactions (Couto and Zipfel, 2016;  
471 Dodds and Rathjen, 2010). The plant Golgi apparatus and peroxisomes have been reported as targets  
472 of effectors from various pathogenic filamentous fungi (Robin et al., 2018). The enrichment of these  
473 GO terms in up-regulated genes in *T. aestivum* suggests that these cellular components may be direct  
474 or indirect targets for effectors derived from *Pgt*. Analyses with the full GO term set revealed many  
475 enriched terms among downregulated genes related to photosynthesis in W2691 and W2691+*Sr9b*; a

## Wheat stem rust susceptibility

476 decrease in chlorophyll and photosynthetic activity has been previously reported in wheat infected with  
477 *Pgt* (Berghaus and Reisener, 1984; Moerschbacher et al., 1994).

478  
479 Several *S* genes to diverse pathogens have been identified or postulated in various plant species (van  
480 Schie and Takken, 2014; Engelhardt et al., 2018). While this area of research for cereal rust pathogens  
481 is in its infancy, positive results from other pathosystems make a strong case to consider the  
482 modification of *S* genes as an approach to deliver durable and broad-spectrum disease resistance. So  
483 far, only a few host-delivered avirulence effectors, *AvrSr50* (Chen et al., 2017), *AvrSr35* (Salcedo et  
484 al., 2017), *AvrSr27* (Upadhyaya et al., accepted) from any cereal rust fungi have been isolated. These  
485 were identified in *Pgt* and how these effectors disrupt defense responses in compatible interactions  
486 remains unknown. Future research seeking to identify which plant proteins these effectors target will  
487 help elucidating *S* genes or processes required for stem rust susceptibility.

488  
489 Here, expression patterns of gene orthologs in *T. aestivum* and *B. distachyon* corresponding to  
490 previously characterized *S* genes in *H. vulgare* and *A. thaliana* were examined to develop a framework  
491 to study *S* genes in wheat. A key focus of this study was to develop a workflow to extract orthologs  
492 with high expression in stem rust susceptible *T. aestivum*, but low expression in either *T. aestivum* with  
493 intermediate resistance, or *B. distachyon*. To link these candidate *S* genes with the biological pathways  
494 in *T. aestivum* and *B. distachyon*, we constructed gene co-expression networks, which can be explored  
495 to determine the role of components of these pathways and the complex interplay towards regulation  
496 of susceptibility in *Pgt-T. aestivum* interactions.

497  
498 The biological functions of *S* genes in compatible-plant microbe interactions are diverse, as these genes  
499 play roles in a wide array of events that are critical for pathogen accommodation and survival  
500 (Engelhardt et al., 2018). Some of these susceptibility genes can act as negative regulators of immune  
501 responses, such as PTI, cell death, and phytohormone-related defense. Our study determined that *T.*  
502 *aestivum* orthologs of the BAX inhibitor-1 (*BI-1*) gene in *H. vulgare* are candidate *S* genes, as these  
503 were upregulated in W2691 (6 dpi) and W2691+*Sr9b* (4-6 dpi) whereas their expression in *B.*  
504 *distachyon* was not affected. *BI-1* is an endoplasmic reticulum membrane-localized cell death  
505 suppressor in *A. thaliana*, and its wheat ortholog *TaBI-1* (accession GR305011) is proposed to  
506 contribute to susceptibility in *T. aestivum* to the biotrophic pathogen *Puccinia striiformis* f. sp. *tritici*  
507 (Wang et al., 2012). Interestingly, the highest upregulation of the *BI-1* was detected in the W2691+*Sr9b*  
508 genotype where it is necessary to regulate a HR upon *Pgt* recognition. Given this result it should be

## Wheat stem rust susceptibility

509 examined if *BI-1* may be a conserved plant *S* factor to wheat rust fungi. Various orthologs of *FAH1*,  
510 which encodes a ferulate 5-hydroxylase in *A. thaliana*, were upregulated in the *T. aestivum* genotypes  
511 upon *Pgt* infection (Mitchell and Martin, 1997). According to studies in *A. thaliana* FAH1 plays a role  
512 in *BI-1*-mediated cell death suppression through interaction with cytochrome b<sub>5</sub> and biosynthesis of  
513 very-long-chain fatty acids (Nagano et al., 2012). Additional findings further suggest that *Pgt* can also  
514 interfere with cell death signaling by altering *VADI* expression. The *VADI* gene encodes a putative  
515 membrane-associated protein with lipid binding properties and it is proposed to act as negative  
516 regulator of cell death (Lorrain et al., 2004; Khafif et al., 2017). Transcriptional activation of *VADI*  
517 has been shown to occur in advanced stages in plant pathogen interactions (Bouchez et al., 2007). We  
518 detected an upregulation of *VADI* orthologs in *T. aestivum* at 6 dpi, which is considered a late infection  
519 stage in the establishment of rust colonies.

520

521 Salicylic acid (SA) is a key phytohormone required to orchestrate responses to many pathogens (Ding  
522 and Ding, 2020). Similar to VAD1 whose function as a *S* factor is SA-dependent, we also uncovered  
523 other upregulated genes that may also participate in defense suppression. The orthologs of the *DMR6*  
524 are highly upregulated in *T. aestivum* at 4 and 6 dpi in both compatible and incompatible interactions.  
525 As characterized in *A. thaliana*, *DMR6* encodes a putative 2OG-Fe(II) oxygenase that is defense-  
526 associated and required for susceptibility to downy mildew through regulation of the SA pathway (Van  
527 Damme et al., 2008, Zhang et al., 2017). The role of *DMR6* in disease susceptibility holds significant  
528 promise to control diverse pathogens. For instance, mutations in *DMR6* confer resistance to  
529 hemibiotrophic pathogens *Pseudomonas syringae* and *Phytophthora capsici* (Zeilmaker et al., 2014)  
530 and silencing of *DMR6* in potato increases resistance to the potato blight causal agent, *P. infestans*  
531 (Sun et al., 2016). It has also been shown that the *H. vulgare* ortholog genetically complements *DMR6*  
532 knock-out *A. thaliana* lines and restores susceptibility to *Fusarium graminearum* (Low et al., 2020).  
533 Gene orthologs of *DND1* were also identified as upregulated in both *T. aestivum* genotypes. The gene  
534 *DND1* encodes a cyclic nucleotide-gated ion channel and its activity is also related to SA regulation  
535 (Clough et al., 2000). Mutations in *A. thaliana* *DND1* display enhanced resistance to viruses, bacteria  
536 and fungal pathogens (Genger et al., 2008; Jurkowski et al., 2004; Yu et al., 2000; Sun et al., 2017).  
537 We also noted that several wheat orthologs of the *A. thaliana* gene *IBR3* also increased in expression  
538 as *Pgt* infection advanced. The role of *IBR3* in susceptibility to *P. syringae* in *A. thaliana* has been  
539 confirmed by mutations and overexpression approaches (Huang et al., 2013). Consistent with our  
540 results, *IBR3* is upregulated in *A. thaliana* upon infection by *P. syringae*.

## Wheat stem rust susceptibility

541

542 Plant transcriptional reprogramming triggered by pathogen perception is often mediated by WRKY  
543 transcription factors through activation of the MAP kinase pathways (Eulgen and Somssich, 2007;  
544 Rushton et al., 2010). Here, we detected an upregulation of the expression of *WRKY25* orthologs that  
545 was most prominent at 6 dpi in the W2691+*Sr9b* genotype. The Arabidopsis gene *AtWRKY25* is  
546 induced in response to the bacterial pathogen *Pseudomonas syringae* and the SA-dependent activity of  
547 *AtWRKY25* is also linked to defense suppression (Zheng et al., 2007). According to results from this  
548 study, the contribution of orthologs of *AGD2* to stem rust susceptibility in *T. aestivum* should also be  
549 examined. *AGD2* encodes an aminotransferase and participates in lysine biosynthesis at the chloroplast  
550 (Song et al., 2004). Given that several oomycete and fungal effectors target the chloroplast (Kretschmer  
551 et al., 2020), effector research in cereal rust pathogens will be crucial to determine if these pathogens  
552 also target this organelle.

553

554 A classic example of *S* genes in barley is given by the *Mlo* gene (Jørgensen, 1992) in which a recessive  
555 mutation results in broad spectrum resistance to *Blumeria graminis* f. sp. *hordei*, the causal agent of  
556 powdery mildew. The *Mlo* gene family is highly conserved across monocot and dicot plants and gene  
557 editing of *Mlo* homeologs in wheat confers resistance to powdery mildew (Acevedo-Garcia et al.,  
558 2017). Interestingly, *Mlo* genes in *T. aestivum* have not been reported to provide protection against  
559 cereal rust diseases. Consistent with this, this study did not detect a significant change in the expression  
560 of *Mlo* alleles in *T. aestivum* genotypes (W2691 and W2691+*Sr9b*) over the course of the experiment.

561

562 One caveat of this study is that some *S* genes in *T. aestivum* for *Pgt* may not be found in model species  
563 like *A. thaliana* or detected using other pathogens. However, this is a first step to identify candidates  
564 to guide functional studies. While in this study we focused on orthologous *S* genes, the gene co-  
565 expression networks presented here are excellent resources to identify additional candidate *S* factors.  
566 It is possible that some of the genes included in clusters of these networks are part of the regulatory  
567 process that control expression of *S* genes or are part of essential pathways although their function may  
568 not be characterized yet in other systems. Future functional studies are required to validate the function  
569 of these genes in *T. aestivum* as *S* factors for rust infection and determine if these can be exploited for  
570 agricultural practice. A key aspect for the success of these novel approaches is the absence of plant  
571 developmental defects resulting from mutations of *S* genes. In some cases, the loss-of-function of  
572 negative regulators leads to constitutive activation of plant defense responses that manifest as poor  
573 growth or lesion-mimic phenotypes among other pleiotropic effects (Büsches et al., 1997; Ge et al.,



## Wheat stem rust susceptibility

574 2016). VIGS-mediated transient gene silencing (Lee et al., 2015), RNAi-mediated silencing (Sun et  
575 al., 2016; Helliwell and Waterhouse, 2003; Waterhouse and Helliwell, 2003), TILLING populations  
576 include some of the approaches to explore the potential use of these *S* gene candidates. Gene editing  
577 technologies through Zinc Finger nucleases, TALENs, CRISPR/Cas9 systems also offer options to  
578 generate transgene free plants (Urnov et al., 2010; Gaj et al., 2013; Luo et al., 2019; Kim et al., 2017;  
579 Jia et al., 2017; Wang et al., 2014; Jia et al., 2017; Nekrasov et al., 2017). In conclusion, as the demands  
580 for multi-pathogen durable disease resistance rise, our ability to target *S* genes may serve as a sound  
581 approach to harness genetic diversity and maximize the resources to meet critical these grand  
582 challenges.

583

### 584 **5 Conflict of Interest**

585 The authors declare that the research was conducted in the absence of any commercial or financial  
586 relationships that could be construed as a potential conflict of interest.

### 587 **6 Author Contributions**

588 MF, CDH, CLM, and SFK conceived and designed the study; VO, MEM, FL, and MF conducted the  
589 experiments; ECH, EG, JMM, RDC, CDH, SPG, JPV, and MEM contributed to data analysis. ECH,  
590 BJS, SFK, CDH and MF interpreted results. ECH, VO, CDH, and MF wrote the manuscript; all authors  
591 contributed to manuscript editing, revisions and approved the submitted version.

### 592 **7 Funding**

593 This work was supported by a seed grant from the Microbial Plant Genome Institute at The University  
594 of Minnesota, USDA-NIFA grant #2018-67013-27819, University of Minnesota Experimental Station  
595 USDA-NIFA Hatch project MIN-22-086, as well as the USDA-ARS/ The University of Minnesota  
596 Standard Cooperative Agreement (3002-11031-00053115) between SFK and MF. ECH is supported  
597 by a scholarship from the College of Food, Agriculture, and Natural Resource Science at the University  
598 of Minnesota. The work conducted by the US DOE Joint Genome Institute is supported by the Office  
599 of Science of the US Department of Energy under Contract no. DE-AC02-05CH11231.

600

601



## Wheat stem rust susceptibility

### 602 8 Acknowledgments

603 We thank staff at the Minnesota Supercomputing Institute at the University of Minnesota for technical  
604 assistance.

### 605 9 References

- 606 Ahn IP. (2007). Disturbance of the Ca(2+)/calmodulin-dependent signaling pathway is responsible for  
607 the resistance of *Arabidopsis dnd1* against *Pectobacterium carotovorum* infection. *Mol. Plant*  
608 *Pathol.* 8, 747-59
- 609 Alaux, M., Rogers, J., Letellier, T., Flores, R., Alfama, F., Pommier, C., et al. (2018). Linking the  
610 International Wheat Genome Sequencing Consortium bread wheat reference genome sequence  
611 to wheat genetic and phenomic data. *Genome Biol.* 19, 111
- 612 Alexa, A. and Rahnenfuhrer, J. (2020). topGO: Enrichment Analysis for Gene Ontology. R package  
613 version 2.40.0.
- 614 Anders, S., Pyl, P.T., Huber, W. (2015). HTSeq—a Python framework to work with high-throughput  
615 sequencing data. *Bioinformatics.* 31, 166–169
- 616 Ayliffe, M., Singh, D., Park, R., Moscou, M., and Pryor, T. (2013). Infection of *Brachypodium*  
617 *distachyon* with selected grass rust pathogens. *Mol. Plant Microbe In.* 26, 946–957
- 618 Berghaus, R. and Reisener, H.J. (1984). Changes in photosynthesis of wheat plants infected with wheat  
619 stem rust (*Puccinia graminis* f. sp. *tritici*). *Phytopathology.* 112, 165-172
- 620 Bettgenhaeuser, J., Gardiner, M., Spanner, R., Green, P., Hernández-Pinzón, I., Hubbard, A., et al.  
621 (2018). The genetic architecture of colonization resistance in *Brachypodium distachyon* to non-  
622 adapted stripe rust (*Puccinia striiformis*) isolates. *PLoS Genet.* 14
- 623 Bettgenhaeuser, J., Gilbert, B., Ayliffe, M., and Moscou, M. J. (2014). Nonhost resistance to rust  
624 pathogens- a continuation of continua. *Front. Plant Sci.* 5, 664
- 625 Bhattacharya, S. (2017). Deady new wheat disease threatens Europe’s crops. *Nature.* 542:145–146
- 626 Bouchez O., Huard C., Lorrain S., Roby D., Balague C. (2007). Ethylene is one of the key elements  
627 for cell death and defense response control in the *Arabidopsis* lesion mimic mutant *vad1*. *Plant*  
628 *Physiol.* 145, 465-77
- 629 Bozkurt, T. O., McGrann, G. R., MacCormack, R., Boyd, L. A., and Akkaya, M. S. (2010). Cellular  
630 and transcriptional responses of wheat during compatible and incompatible race-specific  
631 interactions with *Puccinia striiformis* f. sp. *tritici*. *Mol. Plant Pathol.* 11, 625–640
- 632 Briatte, F. (2020). *ggnetwork: Geometries to Plot Networks with “ggplot2.”*

## Wheat stem rust susceptibility

- 633 Büschges, R., Hollricher, K., Panstruga, R. Simons, G., Wolter, M., Frijters, A., et al. (1997). The  
634 Barley *Mlo* Gene: A Novel Control Element of Plant Pathogen Resistance. *Cell*. 88(5), 695-  
635 705
- 636 Bushnell, W. R. (1984). 15 - Structural and Physiological Alterations in Susceptible Host Tissue. Pages  
637 477–507 in: *The Cereal Rusts*, W.R. Bushnell and A.P. Roelfs, eds. Academic Press.
- 638 Butts, C. T. (2015). *network: Classes for Relational Data*.
- 639 Butts, C. T. (2019). *sna: Tools for Social Network Analysis*.
- 640 Chandra, S., Singh, D., Pathak, J., Kumari, S., Kumar, M., Poddar, R., et al. (2016). *De novo* assembled  
641 wheat transcriptomes delineate differentially expressed host genes in response to leaf rust. *PLoS*  
642 *ONE*. 11
- 643 Chen, B., Jiang, J., Zhou, X. (2007). A *TOM1* homologue is required for multiplication of Tobacco  
644 mosaic virus in *Nicotiana benthamiana*. *J. Zhejiang Univ. - Sci. B*. 8, 256–259
- 645 Chen, L.-Q., Hou, B.-H., Lalonde, S., Takanaga, H., Hartung, M. L., Qu, X.-Q., et al. (2010). Sugar  
646 transporters for intercellular exchange and nutrition of pathogens. *Nature*. 468, 527–532
- 647 Clough, S. J., Fengler, K. A., Yu, I. C., Lippok, B., Smith, R. K., Jr, and Bent, A. F. (2000). The  
648 Arabidopsis *dnd1* “defense, no death” gene encodes a mutated cyclic nucleotide-gated ion  
649 channel. *Proc. Natl. Acad. Sci. USA*. 97, 9323–9328
- 650 Couto, D., and Zipfel, C. (2016). Regulation of pattern recognition receptor signaling in plants. *Nat.*  
651 *Rev. Immunol.* 16, 537–552
- 652 Ding, P., Ding, Y. (2020). Stories of Salicylic Acid: A Plant Defense Hormone. *Trends Plant Sci.*  
653 25(6), 549-565
- 654 Dobin, A., Davis, C. A., Schlesinger, F., Drenkow, J., Zaleski, C., Jha, S., et al. (2012). STAR: ultrafast  
655 universal RNA-seq aligner. *Bioinformatics*. 29, 15–21
- 656 Dobon, A., Bunting, D. C., Cabrera-Quio, L. E., Uauy, C., and Saunders, D. G. (2016). The host-  
657 pathogen interaction between wheat and yellow rust induces temporally coordinated waves of  
658 gene expression. *BMC Genomics*. 17, 380
- 659 Dodds, P. N., and Rathjen, J. P. (2010). Plant immunity: towards an integrated view of plant-pathogen  
660 interactions. *Nat. Rev. Genet.* 11, 539–548
- 661 Duplessis, S., Cuomo, C. A., Lin, Y. C., Aerts, A., Tisserant, E., Veneault-Fourrey, C., et al. (2011).  
662 Obligate biotrophy features unraveled by the genomic analysis of rust fungi. *Proc. Natl. Acad.*  
663 *Sci. USA*. 108, 9166–9171
- 664 Eichmann R., Bischof M., Weis C., Shaw J., Lacomme C., et al. (2010). BAX INHIBITOR-1 Is

## Wheat stem rust susceptibility

- 665 Required for Full Susceptibility of Barley to Powdery Mildew. *Mol. Plant Microbe In.* 23,  
666 1217-27
- 667 Ellis, J. G., Lagudah, E. S., Spielmeyer, W., and Dodds, P. N. 2014. The past, present and future of  
668 breeding rust resistant wheat. *Front. Plant Sci.* 5, 641
- 669 Emms, D.M., Kelly, S. (2019). OrthoFinder: phylogenetic orthology inference for comparative  
670 genomics. *Genome Biol.* 20(238)
- 671 Engelhardt, S., Stam, R., Hüchelhoven, R. (2018). Good Riddance? Breaking Disease Susceptibility in  
672 the Era of New Breeding Technologies. *Agronomy.* 8, 114
- 673 Eulgem, T. and Somssich, I. E. (2007). Networks of WRKY transcription factors in defense  
674 signaling. *Curr. Opin. Plant Bio.* 10:366–371
- 675 Figueroa, M., Alderman, S., Garvin, D. F., and Pfender, W. F. (2013). Infection of *Brachypodium*  
676 *distachyon* by formae speciales of *Puccinia graminis*: early infection events and host-pathogen  
677 incompatibility. *PLoS ONE.* 8
- 678 Figueroa, M., Castell-Miller, C. V., Li, F., Hulbert, S. H., and Bradeen, J. M. (2015). Pushing the  
679 boundaries of resistance: insights from *Brachypodium*-rust interactions. *Front. in Plant Sci.* 6,  
680 558
- 681 Flor, H. H. (1971). Current status of the gene-for-gene concept. *Annu. Rev. Phytopathology.* 9, 275–  
682 296
- 683 Garnica, D. P., Nemri, A., Upadhyaya, N. M., Rathjen, J. P., and Dodds, P. N. (2014). The ins and outs  
684 of rust haustoria. *PLoS Pathog.* 10
- 685 Gaj, T., Gersbach, C.A., Barbas, C.F. (2013). ZFN, TALEN, and CRISPR/Cas-based methods for  
686 genome engineering. *Trends Biotechnol.* 31(7), 397-405
- 687 Ge, X.T., Deng, W.W., Lee, Z.Z., Lopez-Ruiz, F.J., Schweizer, P., Ellwood, S.R. (2016). Tempered  
688 mlo broad-spectrum resistance to barley powdery mildew in an Ethiopian landrace. *Sci. Rep.* 7,  
689 29558
- 690 Genger, R.K., Jurkowski, G.I., McDowell, J.M., Lu, H., Jung, H.W., Greenberg, J.T., et al. (2008).  
691 Signaling pathways that regulate the enhanced disease resistance of *Arabidopsis* "defense, no  
692 death" mutants. *Mol. Plant Microbe In.* 21, 1285-96
- 693 Gilbert, B., Bettgenhaeuser, J., Upadhyaya, N., Soliveres, M., Singh, D., Park, R. F., et al. (2018).  
694 Components of *Brachypodium distachyon* resistance to nonadapted wheat stripe rust pathogens  
695 are simply inherited. *PLoS Genet.* 14
- 696 Govrin E.M., Levine A. (2000). The hypersensitive response facilitates plant infection by the  
697 necrotrophic pathogen *Botrytis cinerea*. *Curr. Biol.* 10, 751-7

## Wheat stem rust susceptibility

- 698 Harder, D. E., and Chong, J. (1984). Structure and physiology of haustoria. Pages 416–460 in: The  
699 Cereal Rusts, W. Bushnell, ed. Academic Press.
- 700 Helliwell, C., Waterhouse, P. (2003). Constructs and methods for high-throughput gene silencing in  
701 plants. *Methods*. 30(4), 289-295
- 702 Howe, K. L., Contreras-Moreira, B., De Silva, N., Maslen, G., Akanni, W., Allen, J., et al. (2019).  
703 Ensembl Genomes 2020—enabling non-vertebrate genomic research. *Nucleic Acids Res.* 48,  
704 D689–D695
- 705 Huang T.Y., Desclos-Theveniau M., Chien C.T., Zimmerli L. (2013). *Arabidopsis thaliana* transgenics  
706 overexpressing *IBR3* show enhanced susceptibility to the bacterium *Pseudomonas syringae*.  
707 *Plant Biol. (Stuttg)* 15, 832-40
- 708 Huttenhower C., Hibbs M., Myers C., Troyanskaya O.G. (2006). A scalable method for integration and  
709 functional analysis of multiple microarray datasets. *Bioinformatics*. Dec 1;22(23), 2890-7.
- 710 Jia, H.G., Zhang, Y.Z., Orbović, V., Xu, J., White, F.F., Jones, J.B., et al. (2017). Genome editing  
711 of the disease susceptibility gene *CsLOB1* in citrus confers resistance to citrus canker. *Plant*  
712 *Biotechnol. J.* 15, 817–823
- 713 Jørgensen J.H. (1992). Discovery, characterization and exploitation of *Mlo* powdery mildew resistance  
714 in barley. *Euphytica*. 63, 141–152.
- 715 Jurkowski, G.I., Smith, R.K. Jr., Yu, I., Ham, J.H., Sharma, S.B., Klessig, D.F., et al. (2004).  
716 *Arabidopsis* DND2, a second cyclic nucleotide-gated ion channel gene for which mutation  
717 causes the “defense, no death” phenotype. *Mol. Plant-Microbe Interact.* 17(5), 511–20.
- 718 Kellogg, E. A. (2001). Evolutionary history of the grasses. *Plant Physiol.* 125:1198–1205
- 719 Khafif, M., Balagué, C., Huard-Chauveau, C., and Roby, D. (2017). An essential role for the VASt  
720 domain of the *Arabidopsis* *VADI* protein in the regulation of defense and cell death in response  
721 to pathogens. *PLoS ONE*. 12, e0179782
- 722 Kim, D., Alptekin, B., Budak, H. (2018). CRISPR/Cas9 genome editing in wheat. *Funct. Integr.*  
723 *Genomics*. 18, 31–41
- 724 König S., Feussner K., Schwarz M., Kaefer A., Iven T., Landesfeind, M., et al. (2012). *Arabidopsis*  
725 mutants of sphingolipid fatty acid alpha-hydroxylases accumulate ceramides and salicylates.  
726 *New Phytol.* 196, 1086-97
- 727 Kretschmer, M., Damoo, D., Djamei, A., Kronstad, J. (2020). Chloroplasts and Plant Immunity: Where  
728 Are the Fungal Effectors? *Pathogens*. 9, 19
- 729 Lamesch, P., Berardini, T. Z., Li, D., Swarbreck, D., Wilks, C., Sasidharan, R., et al. (2011). The

## Wheat stem rust susceptibility

- 730 Arabidopsis Information Resource (TAIR): improved gene annotation and new tools. *Nucleic*  
731 *Acids Res.* 40, D1202–D1210
- 732 Lapin, D., and Van den Ackerveken, G. (2013). Susceptibility to plant disease: more than a failure of  
733 host immunity. *Trends Plant Sci.* 18, 546–554
- 734 Lawrence-Dill, C. (2019). GOMAP Wheat Reference Sequences 1.1. 1.1. CyVerse Data Commons.  
735 DOI: 10.25739/65kf-jz20
- 736 Lee, W. S., Rudd, J. J., Kanyuka, K. (2015). Virus induced gene silencing (VIGS) for functional  
737 analysis of wheat genes involved in *Zymoseptoria tritici* susceptibility and resistance. *Fungal*  
738 *Genet. Biol.* 79, 84–88
- 739 Lemoine, F., Correia, D., Lefort, V., Doppelt-Azeroual, O., Mareuil, F., Cohen-Boulakia, S., et al.  
740 (2019). NGPhylogeny.fr: new generation phylogenetic services for non-specialists. *Nucleic*  
741 *Acids Res.* 47, W260–W265
- 742 Lo Presti, L., Lanver, D., Schweizer, G., Reissman, S., and Kahmann, R. (2015). Fungal effectors and  
743 plant susceptibility. *Annu. Rev. Plant Biol.* 66, 513–545
- 744 Lorrain S., Lin B., Auriac M.C., Kroj T., Saindrenan P., Nicole, M., et al. (2004). Vascular associated  
745 death1, a novel GRAM domain-containing protein, is a regulator of cell death and defense  
746 responses in vascular tissues. *Plant Cell.* 16, 2217-32
- 747 Love, M.I., Huber, W., and Anders, S. (2014). Moderated estimation of fold change and dispersion for  
748 RNA-seq data with DESeq2. *Genome Biol.* 15, 550
- 749 Low, Y. C., Lawton, M. A., and Di, R. (2020). Validation of barley 2OGO gene as a functional  
750 orthologue of Arabidopsis *DMR6* gene in *Fusarium* head blight susceptibility. *Sci. Rep-UK.*  
751 10, 9935
- 752 Luig, N.H. and Watson, I.A. (1972). The role of wild and cultivated grasses in the hybridization of  
753 formae speciales of *Puccinia graminis*. *Aust. J. Biol. Sci.* 25(2), 335-342
- 754 Luo, M., Li, H., Chakraborty, S., Morbitzer, R., Rinaldo, A., Upadhyaya, N., et al. (2019). Efficient  
755 TALEN-mediated gene editing in wheat. *Plant Biotechnol. J.* 17, 2026-2028.
- 756 Manickavelu, A., Kawaura, K., Oishi, K., Shin-I, T., Kohara, Y., Yahiaoui, N., (2010). Comparative  
757 gene expression analysis of susceptible and resistant near-isogenic lines in common wheat  
758 infected by *Puccinia triticina*. *DNA Res.* 17(4), 211–222
- 759 Martin, M. (2011). Cutadapt removes adapter sequences from high-throughput sequencing reads.  
760 *EMBnet.journal*, 17(1), 10-12. doi.org/10.14806/ej.17.1.200
- 761 McIntosh, R., Wellings, C., and Park, R. (1995). *Wheat Rusts: An atlas of resistance genes*. CSIRO.
- 762 Mitchell, A.G., Martin, C.E. (1997). Fah1p, a *Saccharomyces cerevisiae* cytochrome b5 fusion

## Wheat stem rust susceptibility

- 763 protein, and its *Arabidopsis thaliana* homolog that lacks the cytochrome *b5* domain both  
764 function in the  $\alpha$ -hydroxylation of sphingolipid-associated very long chain fatty acids. *J. Biol.*  
765 *Chem.* 272, 28281–28288.
- 766 Moerschbacher, B.M., Vander, P., Springer, C., Noll, U., Schmittmann, G. (1994). Photosynthesis in  
767 stem rust-infected, resistant and susceptible near-isogenic wheat leaves. *Can. J. Bot.* 72, 990-  
768 997
- 769 Nagano, M., Takahara, K., Fujimoto, M., Tsutsumi, N., Uchimiya, H., Kawai-Yamada, M. (2012).  
770 *Arabidopsis* sphingolipid fatty acid 2-hydroxylases (AtFAH1 and AtFAH2) are functionally  
771 differentiated in fatty acid 2-hydroxylation and stress responses. *Plant physiol.* 159(3), 1138–  
772 1148.
- 773 Nekrasov, V., Wang, C., Win, J., Lanz, C., Weigel, D., Kamoun, S. (2017). Rapid generation of a  
774 transgene-free powdery mildew resistant tomato by genome deletion. *Sci. Rep.* 7
- 775 Olivera, P., Newcomb, M., Szabo, L. J., Rouse, M., Johnson, J., Gale, S., et al. (2015). Phenotypic and  
776 Genotypic Characterization of Race TKTTF of *Puccinia graminis* f. sp. *tritici* that Caused a  
777 Wheat Stem Rust Epidemic in Southern Ethiopia in 2013–14. *Phytopathology.* 105, 917–928
- 778 Omidvar, V., Dugyala, S., Li, F., Rottschaefer, S. M., Miller, M. E., Ayliffe, M., et al. (2018). Detection  
779 of race-specific resistance against *Puccinia coronata* f. sp. *avenae* in *Brachypodium* species.  
780 *Phytopathology.* 108, 1443–1454
- 781 Paradis, E., and Schliep, K. (2018). ape 5.0: an environment for modern phylogenetics and evolutionary  
782 analyses in R. *Bioinformatics.* 35, 526–528
- 783 Periyannan, S., Milne, R. J., Figueroa, M., Lagudah, E. S., and Dodds, P. N. (2017). An overview of  
784 genetic rust resistance: from broad to specific mechanisms. *PLoS Pathog.* 13
- 785 Pessina, S., Pavan, S., Catalano, D., Gallotta, A., Visser, R.G.F., Bai, Y., Malnoy, M., and Schouten,  
786 H.J. (2014). Characterization of the *MLO* gene family in Rosaceae and gene expression  
787 analysis in *Malus domestica*. *BMC Genomics* 15, 618
- 788 Peterson, P. D. (2001). *Stem rust of wheat: from ancient enemy to modern foe*. American  
789 Phytopathological Society, St. Paul, USA.
- 790 Petre, B., Joly, D. L., and Duplessis, S. (2014). Effector proteins of rust fungi. *Front.Plant Sci.* 5:416
- 791 Pretorius, Z. A., Singh, R. P., Wagoire, W. W., Payne, T. S. (2000). Detection of Virulence to  
792 Wheat Stem Rust Resistance Gene *Sr31* in *Puccinia graminis* f. sp. *tritici* in Uganda. *Plant Dis.*  
793 84, 203
- 794 Rate D.N., Greenberg J.T. (2001). The *Arabidopsis aberrant growth and death2* mutant shows



## Wheat stem rust susceptibility

- 795 resistance to *Pseudomonas syringae* and reveals a role for NPR1 in suppressing hypersensitive  
796 cell death. *Plant J.* 27, 203-11
- 797 Robin, G.P., Kleemann, J., Neumann, U., Cabre, L., Dallery, J.F., Lapalu, N., et al. (2018). Subcellular  
798 localization screening of *Colletotrichum higginsianum* effector candidates identifies fungal  
799 proteins targeted to plant peroxisomes, Golgi bodies, and microtubules. *Front. Plant Sci.* 9, 562
- 800 Rushton, P.J., Somssich, I.E., Ringler, P., Shen, Q.J. (2010). WRKY transcription factors. *Trends*  
801 *Plant Sci.* 15, 247–258
- 802 Salcedo, A., Rutter, W., Wang, S., Akhunova, A., Bolus, S., Chao, S., et al. (2017). Variation in the  
803 *AvrSr35* gene determines *Sr35* resistance against wheat stem rust race Ug99. *Science.* 358,  
804 1604–1606
- 805 Schaefer, R.J., Michno, J.M., Jeffers, J., Hoekenga, O., Dilkes, B., Baxter, I., et al. (2018).  
806 Integrating Coexpression Networks with GWAS to Prioritize Causal Genes in Maize.  
807 *The Plant Cell.* 30(12), 2922-2942
- 808 Singh, R. P., Hodson, D. P., Jin, Y., Lagudah, E. S., Ayliffe, M. A., Bhavani, S., et al. (2015).  
809 Emergence and Spread of New Races of Wheat Stem Rust Fungus: Continued Threat to Food  
810 Security and Prospects of Genetic Control. *Phytopathology.* 105, 872–884
- 811 Song J.T., Lu H., Greenberg J.T. (2004). Divergent roles in *Arabidopsis thaliana* development and  
812 defense of two homologous genes, *aberrant growth and death2* and *AGD2-LIKE DEFENSE*  
813 *RESPONSE PROTEIN1*, encoding novel aminotransferases. *Plant Cell.* 16, 353-66
- 814 Staples, R., and Macko, V. (1984). Germination of Urediospores and Differentiation of Infection  
815 Structures. Pages 255–289 in: *The Cereal Rusts*, W. Bushnell, ed. Academic Press.
- 816 Steffenson, B. J., Case, A. J., Pretorius, Z. A., Coetzee, V., Kloppers, F. J., Zhou, H., et al. (2017).  
817 Vulnerability of Barley to African Pathotypes of *Puccinia graminis* f. sp. *tritici* and Sources of  
818 Resistance. *Phytopathology.* 107, 950–962
- 819 Sun, K., van Tuinen, A., van Kan, J.A.L., Wolters, A.-M.A., Jacobsen, E., Visser, R.G.F., et al. (2017).  
820 Silencing of *DND1* in potato and tomato impedes conidial germination, attachment and hyphal  
821 growth of *Botrytis cinerea*. *BMC Plant Biol.* 17, 235
- 822 Sun, K., Wolters, A.-M.A., Vossen, J.H., Rouwet, M.E., Loonen, A.E.H.M., Jacobsen, E., et al. (2016).  
823 Silencing of six susceptibility genes results in potato late blight resistance. *Transgenic Res.* 25,  
824 731–742
- 825 Su'udi M., Kim M.G., Park S.R., Hwang D.J., Bae S.C., Ahn I.P. (2011). *Arabidopsis* cell death in  
826 compatible and incompatible interactions with *Alternaria brassicicola*. *Mol. Cells.* 31, 593-601
- 827 Upadhyaya, N.M., Mago, R., Panwar V., Hewitt, T., Luo, M., Chen, J., et al. Genomics

## Wheat stem rust susceptibility

- 828 accelerated isolation of a new stem rust avirulence gene - wheat resistance gene pair. *Nat.*  
829 *Plants*. In press.
- 830 Urnov F.D., Rebar, E.J., Holmes M.C., Zhang, H.S., Gregory, P.D. (2010). Genome editing with  
831 engineered zinc finger nucleases. *Nat. Rev. Genet.* 11, 636–646
- 832 Van Damme M., Andel A., Huibers R.P., Panstruga R., Weisbeek P.J., Van den Ackerveken G. (2005).  
833 Identification of *Arabidopsis* loci required for susceptibility to the downy mildew pathogen  
834 *Hyaloperonospora parasitica*. *Mol. Plant Microbe In.* 18, 583-92
- 835 Van Damme M., Huibers R.P., Elberse J., Van den Ackerveken G. (2008). *Arabidopsis DMR6* encodes  
836 a putative 2OG-Fe(II) oxygenase that is defense-associated but required for susceptibility to  
837 downy mildew. *Plant J.* 54, 785-93
- 838 Van Schie, C. C., and Takken, F. L. (2014). Susceptibility genes 101: how to be a good host. *Annu.*  
839 *Rev. Phytopathology.* 52, 551–581
- 840 Vogel, J., Hill, T. (2008). High-efficiency *Agrobacterium*-mediated transformation of *Brachypodium*  
841 *distachyon* inbred line Bd21-3. *Plant Cell Rep.* 27, 471-478
- 842 Vogel, J. P., Tuna, M., Budak, H., Huo, N., Gu, Y.Q., Steinwand, M. A. (2009). Development of SSR  
843 markers and analysis of diversity in Turkish populations of *Brachypodium distachyon*. *BMC*  
844 *Plant Biol.* 9, 88.
- 845 Wang, X., Tang, C., Huang X., Li, F, Chen, X., Zhang G., et al. (2012). Wheat BAX inhibitor-1  
846 contributes to wheat resistance to *Puccinia striiformis*. *J. Exp. Bot.* 63(12), 4571–4584
- 847 Wang, Y., Cheng X., Shan Q., Zhang, Y., Liu, J., Gao, C., et al. (2014). Simultaneous editing of three  
848 homoeoalleles in hexaploid bread wheat confers heritable resistance to powdery mildew. *Nat.*  
849 *Biotechnol.* 32, 947–951
- 850 Waterhouse, P., Helliwell, C. (2003). Exploring plant genomes by RNA-induced gene silencing. *Nat.*  
851 *Rev. Genet.* 4, 29–38
- 852 Wickham, H. 2016. *ggplot2: Elegant Graphics for Data Analysis*. Springer-Verlag, New York.
- 853 Wildermuth, M. C. (2010). Modulation of host nuclear ploidy: a common plant biotroph mechanism.  
854 *Curr. Opin. Plant Biol.* 13, 449–458
- 855 Yadav, I. S., Sharma, A., Kaur, S., Nahar, N., Bhardwaj, S. C., Sharma, T.R., et al. (2016).  
856 Comparative temporal transcriptome profiling of wheat near isogenic line carrying *Lr57* under  
857 compatible and incompatible interactions. *Front. Plant Sci.* 7, 1943
- 858 Yu, G., Smith, D.K., Zhu, H., Guan, Y., and Lam, T.T.-Y. (2017). ggtree: an r package for

## Wheat stem rust susceptibility

- 859 visualization and annotation of phylogenetic trees with their covariates and other associated  
860 data. *Methods Ecol. Evol.* 8, 28–36
- 861 Yu, I., Fengler, K.A., Clough, S.J., Bent, A.F. (2000). Identification of Arabidopsis mutants exhibiting  
862 an altered hypersensitive response in gene-for-gene disease resistance. *Mol. Plant-Microbe*  
863 *Interact.* 13(3), 277–86.
- 864 Zambino, P.J., Kubelik, A.R., and Szabo, L.J. (2000). Gene action and linkage of avirulence genes  
865 to DNA markers in the rust fungus *Puccinia graminis*. *Phytopathology.* 90, 819–826
- 866 Zaidi, S.S., Mukhtar, M.S., Mansoor, S. (2018). Genome Editing: Targeting Susceptibility Genes for  
867 Plant Disease Resistance. *Trends Biotechnol.* 36(9), 898-906
- 868 Zhang, H., Yang, Y., Wang, C., Liu, M., Li, H., Fu, Y., et al. (2014). Large-scale transcriptome  
869 comparison reveals distinct gene activations in wheat responding to stripe rust and powdery  
870 mildew. *BMC Genomics.* 15, 898
- 871 Zhang, Y., Zhao, L., Zhao, J., Li, Y., Wang, J., Guo, R., et al. (2017). *S5H/DMR6* Encodes a Salicylic  
872 Acid 5-Hydroxylase That Fine-Tunes Salicylic Acid Homeostasis. *Plant Physiol.* 175, 1082–  
873 1093
- 874 Zheng, Z., Mosher, S.L., Fan, B., Klessig, D.F., Chen, Z. (2007). Functional analysis of Arabidopsis  
875 WRKY25 transcription factor in plant defense against *Pseudomonas syringae*. *BMC Plant Biol.*  
876 7, 2
- 877 Zeilmaker, T., Ludwig, N.R., Elberse, J., Seidl, M.F., Berke, L., Van Doorn, A., et al. (2015). DOWNY  
878 MILDEW RESISTANT 6 and DMR6-LIKE OXYGENASE 1 are partially redundant but distinct  
879 suppressors of immunity in Arabidopsis. *Plant J.* 81, 210-222
- 880

## 881 10 Data Availability Statement

882 Sequence data was deposited in NCBI under BioProject PRJNA483957 (**Table S1**). Unless specified  
883 otherwise, scripts and files for analysis and visualizations are available at  
884 [https://github.com/hennil64/stem\\_rust\\_susceptibility](https://github.com/hennil64/stem_rust_susceptibility).

885

886

887 **11 Tables**

888 **11.1 Table 1. Differentially expressed genes in *T. aestivum* and *B. distachyon* in response to *P.***  
889 ***graminis* f. sp. *tritici* infection.**

| Genotype           | 2 dpi |      | 4 dpi |       | 6 dpi |       |
|--------------------|-------|------|-------|-------|-------|-------|
|                    | up    | down | up    | down  | up    | down  |
| W2691              | 278   | 577  | 2,887 | 2,614 | 6,659 | 7,241 |
| W2691+ <i>Sr9b</i> | 747   | 110  | 3,835 | 1,832 | 6,397 | 5,471 |
| Bd21-3             | 200   | 437  | 559   | 1,419 | 739   | 1,665 |

890 \* Total number of wheat genes: 107,891; total number of *B. distachyon* genes: 39,068. Within-  
891 genotype comparisons used mock treatments as the baseline.

892

893

894 **11.2 Table 2. List of *S* genes explored through the gene expression analysis.**

895

| <b>Gene</b>                                    | <b>Annotation<br/>***</b>                           | <b>Postulated Mechanism<br/>of Susceptibility ***</b>                                        | <b>Pathogen species<br/>and Disease***</b>                           | <b>Reference</b>                                            |
|------------------------------------------------|-----------------------------------------------------|----------------------------------------------------------------------------------------------|----------------------------------------------------------------------|-------------------------------------------------------------|
| <b><i>AGD2</i></b><br>(AT4G33680*)             | Aberrant<br>growth and<br>death 2                   | Defense suppression<br>(possibly SA-dependent)                                               | <i>Pseudomonas<br/>syringae</i> (bacterial<br>speck)                 | Rate and<br>Greenberg, 2001;<br>Song et al., 2004           |
| <b><i>BI-1</i></b><br>(HORVU6Hr1G01<br>4450**) | Bax<br>inhibitor-1                                  | Membrane<br>rearrangement,<br>haustorium<br>establishment, and<br>suppression of cell death  | <i>Blumeria graminis</i><br>f. sp. <i>hordei</i><br>(powdery mildew) | Eichmann et al.,<br>2010                                    |
| <b><i>DMR6</i></b><br>(AT5G24530*)             | 2-<br>oxoglutarate<br>(2OG)-<br>Fe(II)<br>oxygenase | Defense suppression<br>(SA dependent)                                                        | <i>Hyaloperonospora<br/>parasitica</i><br>(downy mildew)             | van Damme et al.,<br>2005, 2008                             |
| <b><i>DND1</i></b><br>(AT5G15410*)             | CNGC2/4<br>cyclic<br>nucleotide                     | Defense suppression and<br>possible regulator of<br>nitric oxide synthesis<br>(SA-dependent) | <i>Hyaloperonospora<br/>parasitica</i>                               | Govrin and<br>Levine, 2000;<br>Ahn, 2007;<br>Genger et al., |

## Wheat stem rust susceptibility

|                                    |                            |                                             |                                                                                                                                                                                                                  |                                            |
|------------------------------------|----------------------------|---------------------------------------------|------------------------------------------------------------------------------------------------------------------------------------------------------------------------------------------------------------------|--------------------------------------------|
|                                    | gated channel              |                                             | (downy mildew), <i>Alternaria brassicicola</i> (black leaf spot), <i>Botrytis cinerea</i> (grey mold/rot), <i>Pectobacterium carotovorum</i> (bacterial soft rot), <i>Pseudomonas syringae</i> (Bacterial speck) | 2008; Su'udi et al., 2011;                 |
| <b><i>FAH1</i></b><br>(AT2G34770*) | Fatty acid hydroxylase 1   | Defense suppression (SA dependent)          | <i>Golovinomyces cichoracearum</i> (powdery mildew)                                                                                                                                                              | Konig et al., 2012                         |
| <b><i>IBR3</i></b><br>(AT3G0*6810) | IBA response 3             | Defense suppression PTI (auxin independent) | <i>Pseudomonas syringae</i> (bacterial speck)                                                                                                                                                                    | Huang et al., 2013                         |
| <b><i>VAD1</i></b><br>(AT1G02120*) | Vascular Associated death1 | Defense suppression (SA and ET dependent)   | <i>Pseudomonas syringae</i> (bacterial speck)                                                                                                                                                                    | Lorrain et al., 2004; Bouchez et al., 2007 |



## Wheat stem rust susceptibility

|                                      |                                       |                                       |                                                            |                    |
|--------------------------------------|---------------------------------------|---------------------------------------|------------------------------------------------------------|--------------------|
| <b><i>WRKY25</i></b><br>(AT2G30250*) | WRKY<br>DNA-<br>binding<br>protein 25 | Defense suppression<br>(SA dependent) | <i>Pseudomonas</i><br><i>syringae</i> (bacterial<br>speck) | Zheng et al., 2007 |
|--------------------------------------|---------------------------------------|---------------------------------------|------------------------------------------------------------|--------------------|

896

Sources:

897

\* TAIR database

898

\*\* Ensembl Plants

899

\*\*\* from van Schie and Takken, 2014

900

901 **12 Figures**

902

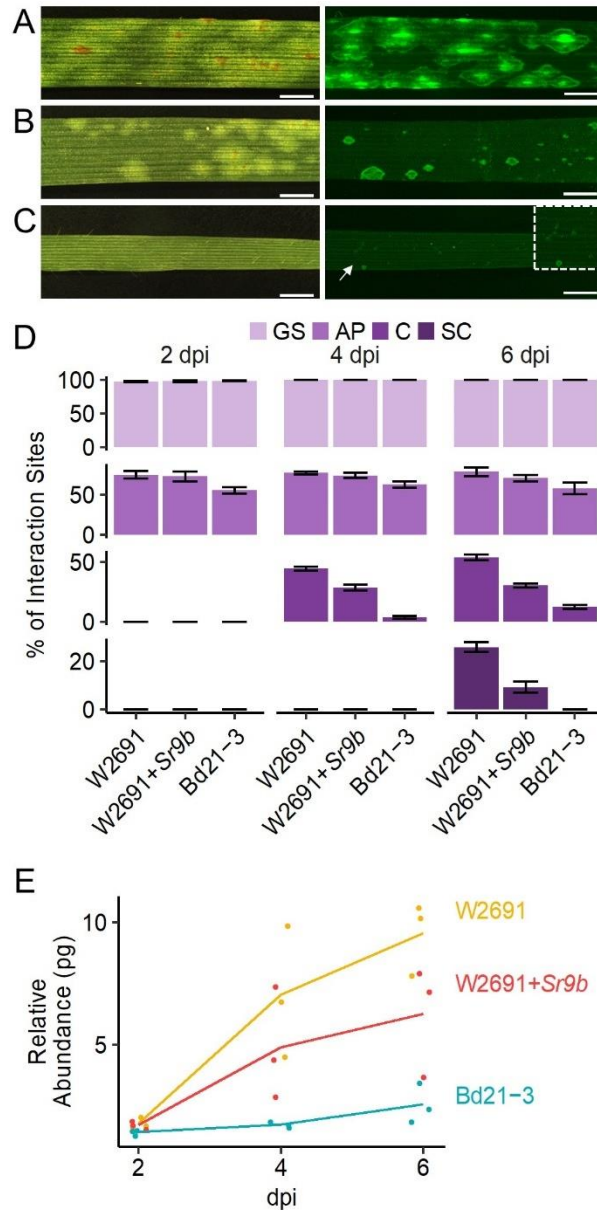

903

904 **Figure 1.** Infection of *T. aestivum* and *B. distachyon* genotypes with *P. graminis* f. sp. *tritici* race  
905 SCCL. (A-C) Development of disease symptoms (left) and fungal colonization (right) at 6 dpi. (A)  
906 W2691 (susceptible wheat line). (B) W2691+*Sr9b* (intermediate resistant wheat line). (C) *B.*  
907 *distachyon* Bd21-3 line (non-host). The white arrow and the white box indicate the area which was  
908 enlarged for better visualization of colonies. Scale bars indicate 2 mm. (D) Percentage of fungal  
909 infection sites which showed germinated urediniospores (GS), appressorium formation (AP), colony

## Wheat stem rust susceptibility

910 establishment (C), and sporulating colony (SC). Error bars represent the standard error of three  
911 independent biological replicates. (E) Fungal DNA abundance in infected W2691, W2691+*Sr9b*, and  
912 Bd21-3 genotypes as measured using qPCR. The points show the sample values and the lines represents  
913 the mean of the samples.  
914

## Wheat stem rust susceptibility

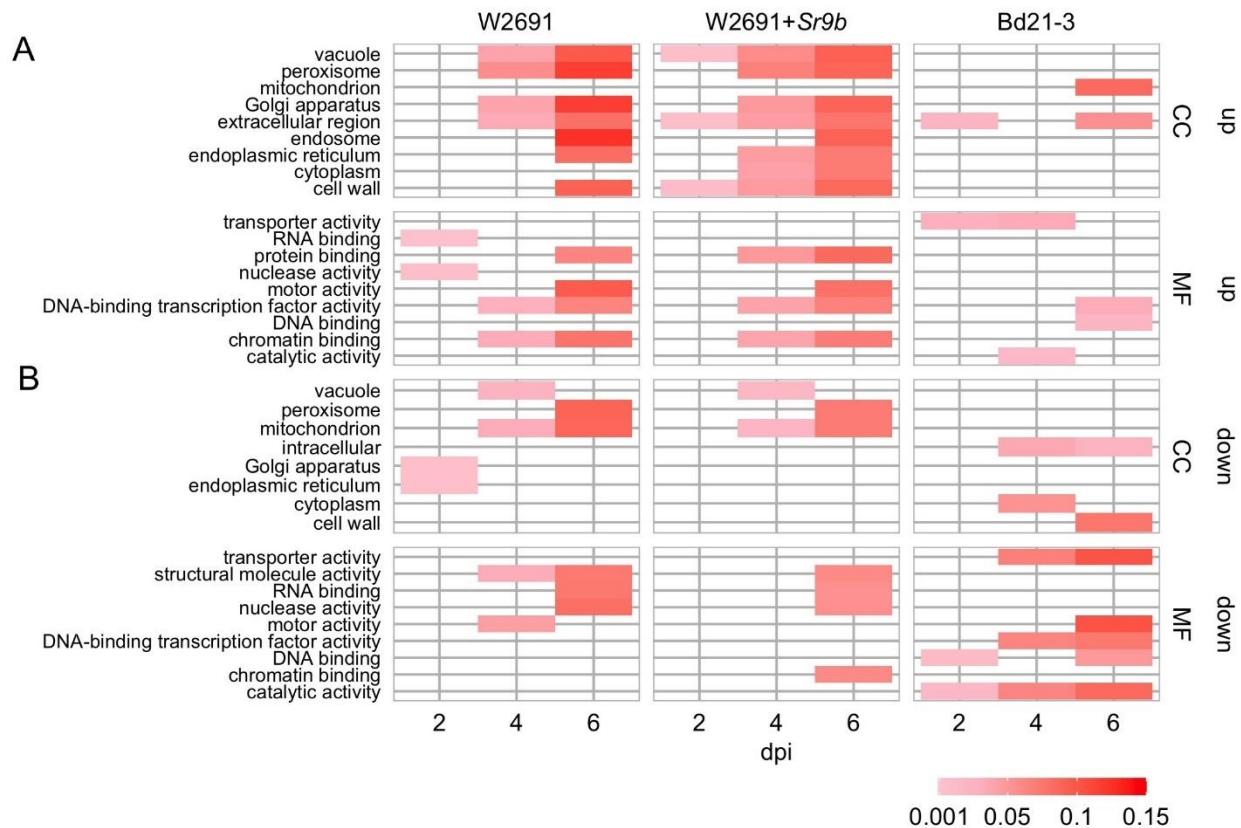

915

916 **Figure 2.** GOslim enrichment analysis of differentially expressed (DE) genes in mock vs inoculated  
 917 *T. aestivum* (W2691 and W2691+*Sr9b*) and *B. distachyon* (Bd21-3) genotypes across three time points  
 918 (bottom x-axis) upon infection with *P. graminis* f. sp. *tritici*. (A) Enrichment of plant GOslim terms of  
 919 upregulated (up) DE genes and (B) downregulated (down) DE genes. The y-axis shows plant GO slim  
 920 terms separated by category: cellular component (CC) and molecular function (MF). The scale  
 921 represents the proportion of genes annotated with each GO term to all the genes tested.

922

## Wheat stem rust susceptibility

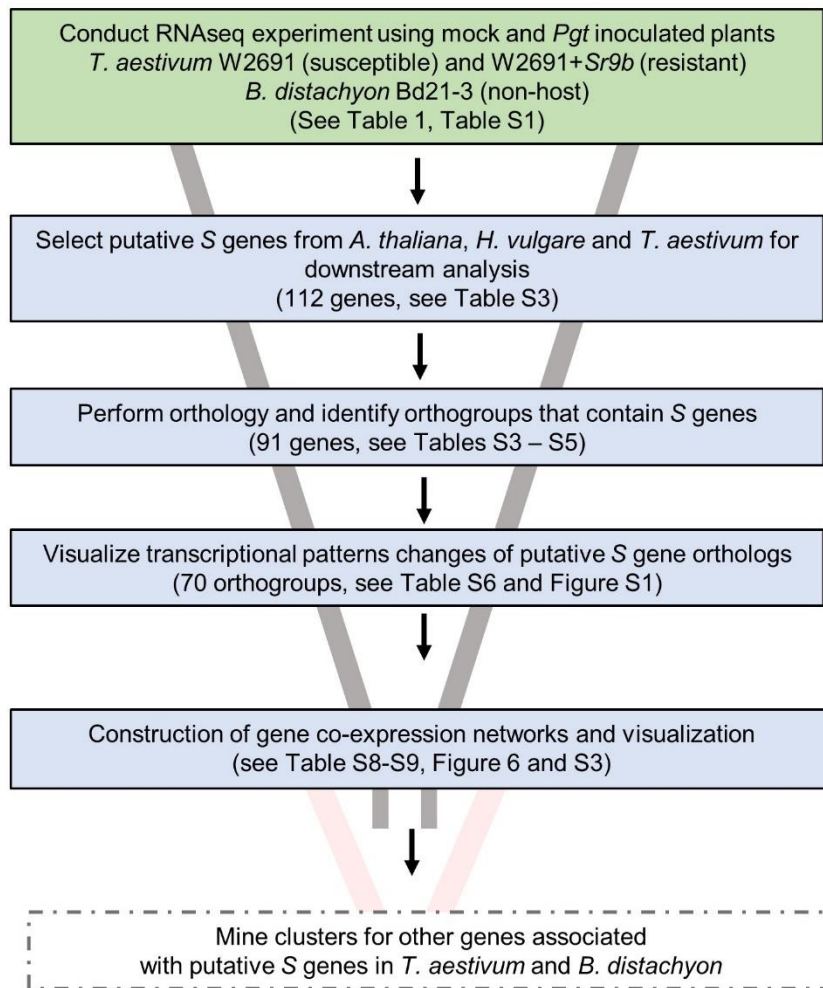

923

924 **Figure 3.** Experimental workflow used to identify candidates of S genes that contribute to infection  
925 of *T. aestivum* by *P. graminis* f. sp. *tritici*. Solid box outlines indicate work completed in this  
926 publication. Future work is indicated by dashed box outlines.

927

## Wheat stem rust susceptibility

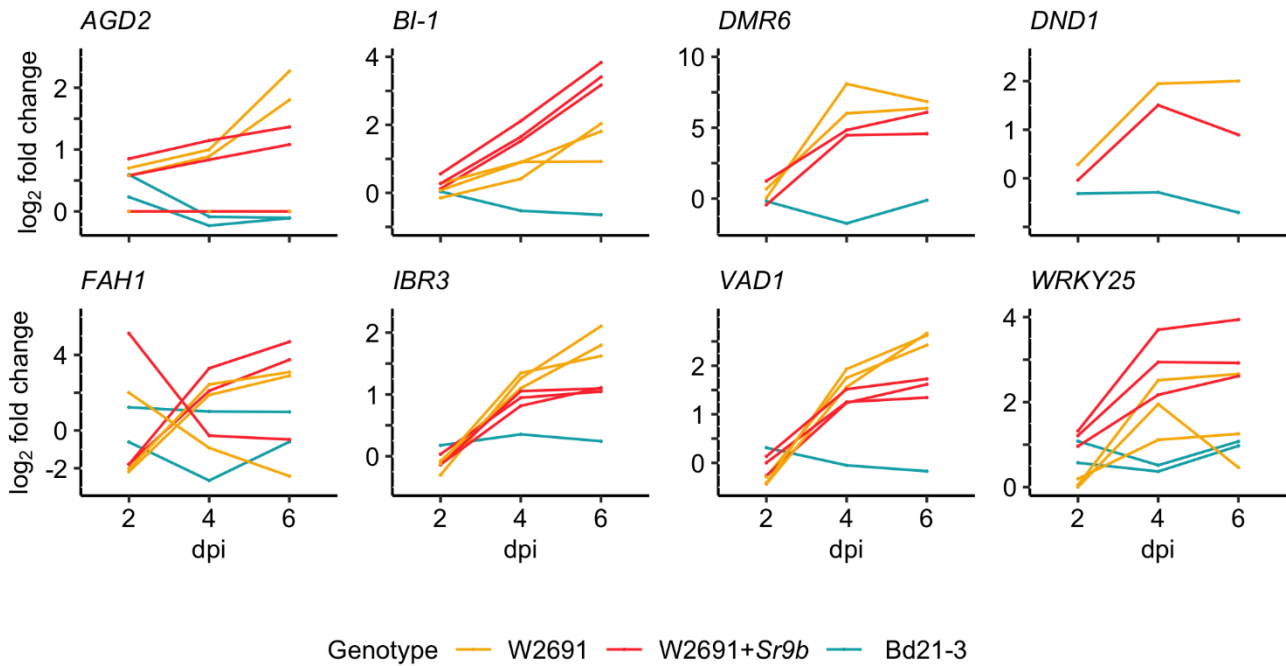

928

929 **Figure 4.** RNAseq expression profile patterns of selected orthogroups containing candidate *S* genes  
930 in *T. aestivum* (W2691 and W2691+*Sr9b*) and *B. distachyon* (Bd21-3) genotypes throughout  
931 infection with *P. graminis* f. sp. *tritici*. Log<sub>2</sub> fold change values for all gene orthologs are presented  
932 for each infected genotype compared to the mock treatment per sampling time point. Gene IDs,  
933 average FPKM values, orthogroup, and co-expression cluster identifiers are presented in Table S7.

934



## Wheat stem rust susceptibility

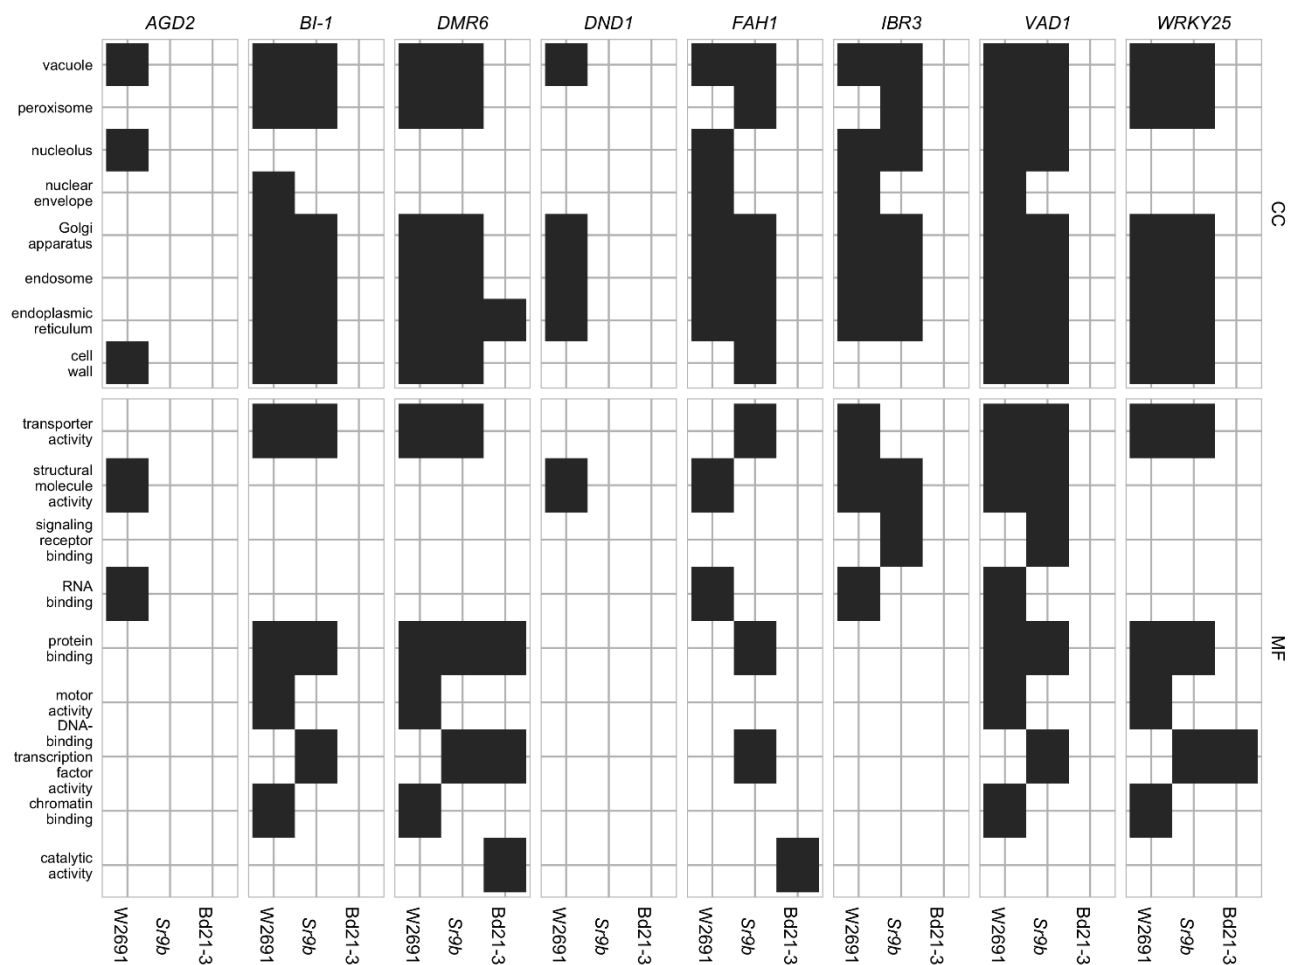

935

936 **Figure 5.** GOslim term enrichment for all genes in co-expression gene clusters containing *S* gene  
 937 orthologs in *T. aestivum* and *B. distachyon*. The y-axis shows GOslim terms separated into categories:

**Wheat stem rust susceptibility**

938 cellular component (CC) and molecular function (MF).

# Wheat stem rust susceptibility

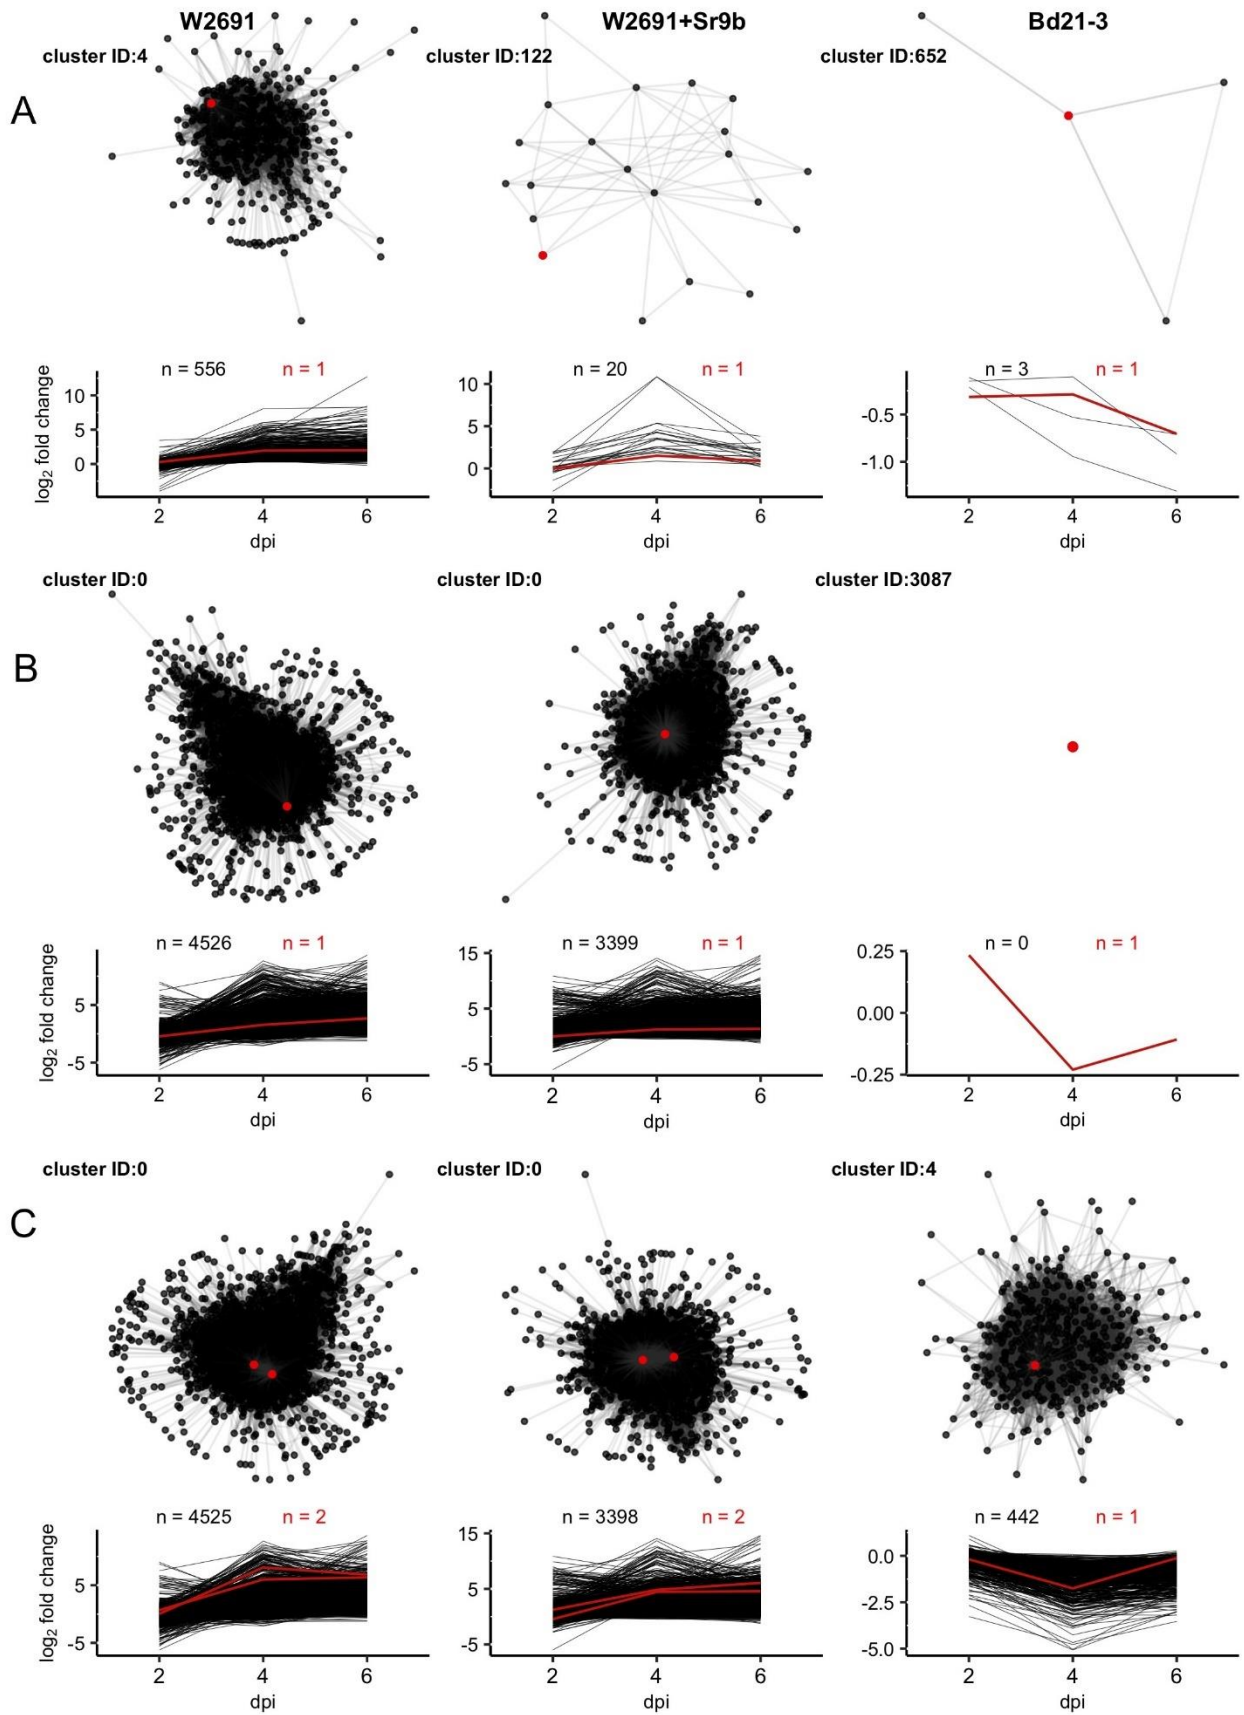

## Wheat stem rust susceptibility

940 **Figure 6.** Network diagrams for clusters containing orthologs of (A) *DND1*, (B) *VAD1*, and (C) *DMR6*  
941 with corresponding plots showing log<sub>2</sub> fold change of all nodes across 2, 4, and 6 dpi. Only connections  
942 with  $Z \geq 3$  are shown. Red lines, points, and counts represent *T. aestivum* and *B. distachyon* orthologs  
943 of *S* genes. Cluster identifiers (IDs) and gene names presented, left to right: *DND1*: 4  
944 (TraesCS5D02G404600), 122 (TraesCS5D02G404600), 652 (BdiBd21-3.1G0110600); *VAD1*: 0  
945 (TraesCS2D02G236800), 0 (TraesCS2D02G236800), 3085 (BdiBd21-3.1G0357000); *DMR6*: 0  
946 (TraesCS4B02G346900), 0 (TraesCS4D02G341800), 4 (BdiBd21-3.1G1026800).  
947

## Wheat stem rust susceptibility

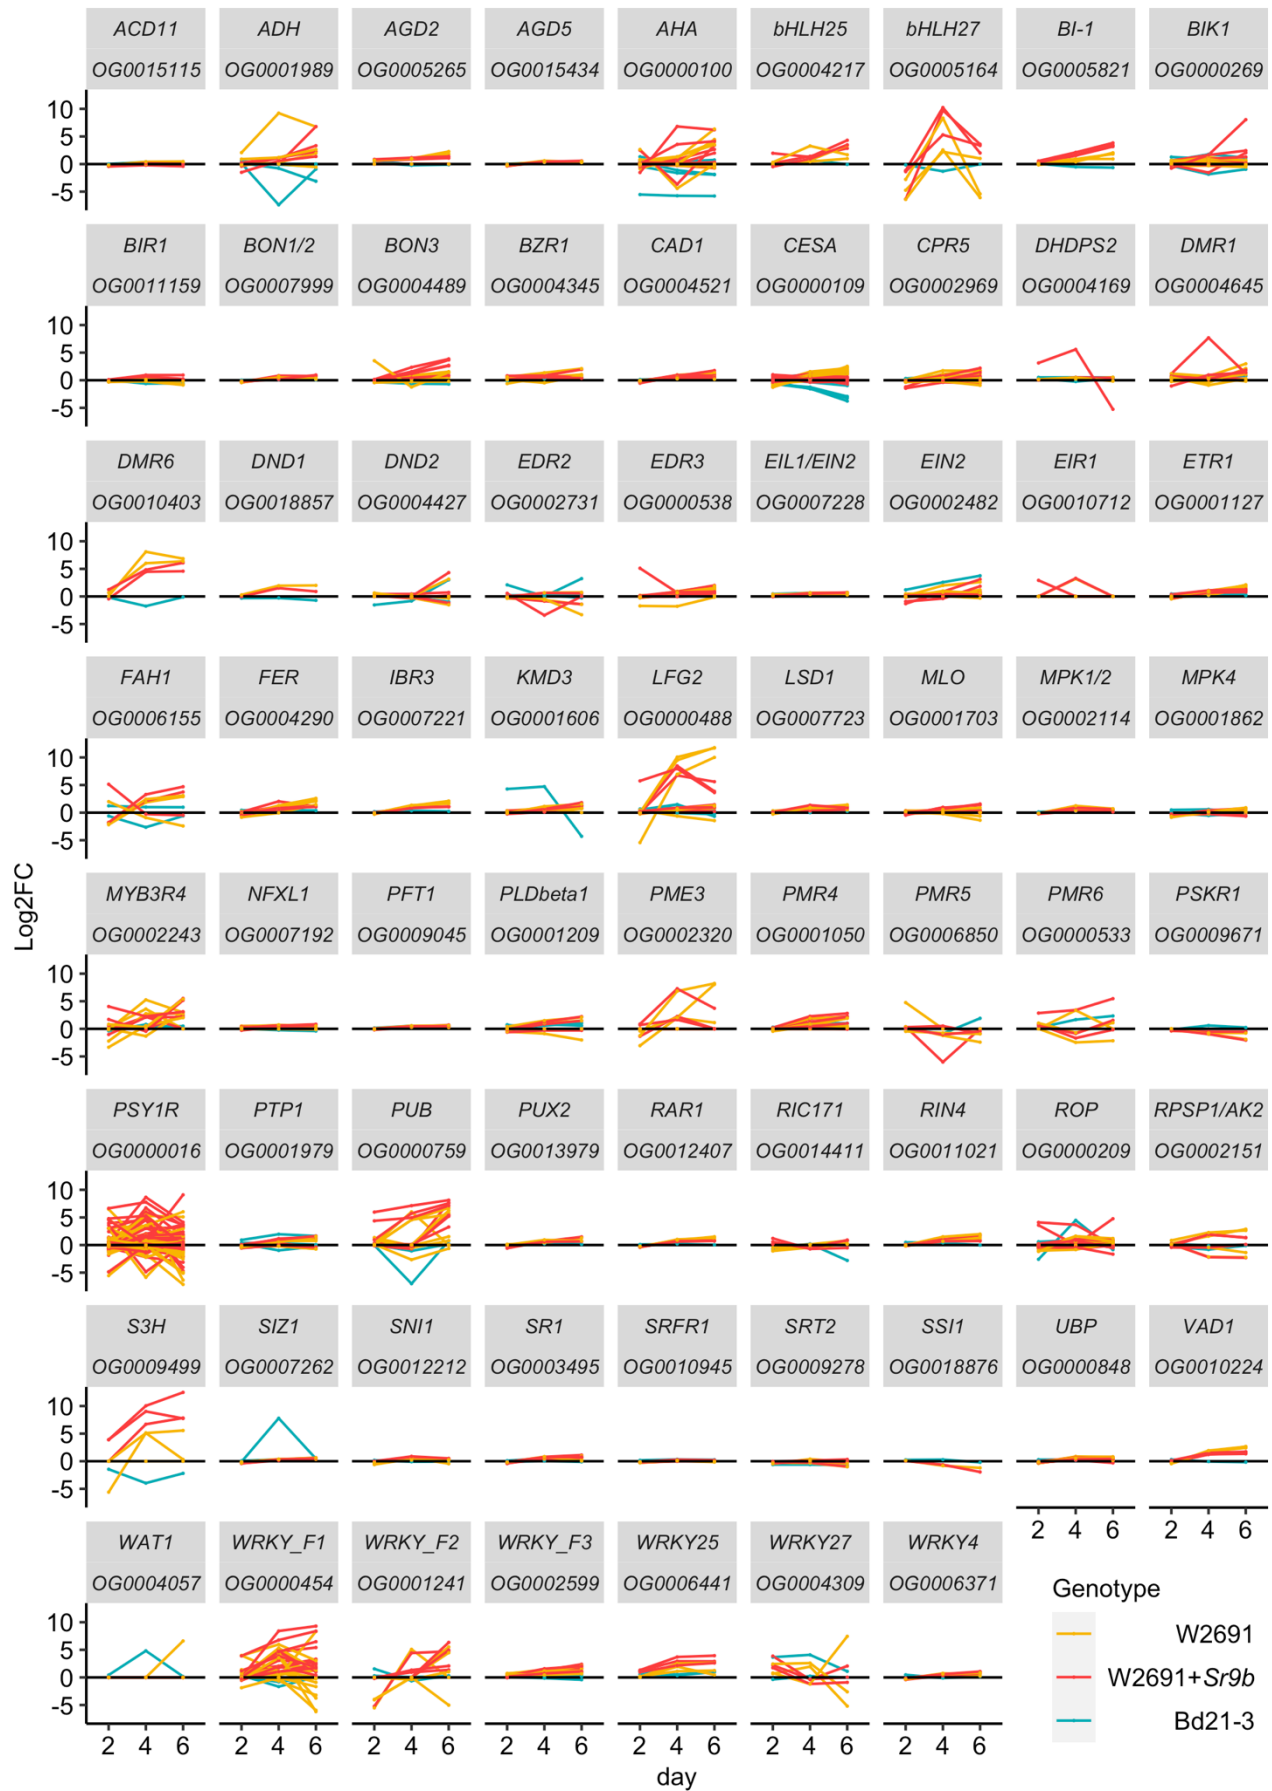

## Wheat stem rust susceptibility

949 **Supplementary Figure 1.** Expression profile patterns of orthogroups containing candidate *S* genes in  
950 *T. aestivum* (W2691 and W2691+*Sr9b*) and *B. distachyon* (Bd21-3) genotypes throughout infection  
951 with *P. graminis* f. sp. *tritici*. Log<sub>2</sub> fold change values (y-axis) for all gene orthologs are presented  
952 per sampling time point (x-axis). Name of *S* gene and orthogroup identifier are shown in each graph.  
953



## Wheat stem rust susceptibility

954

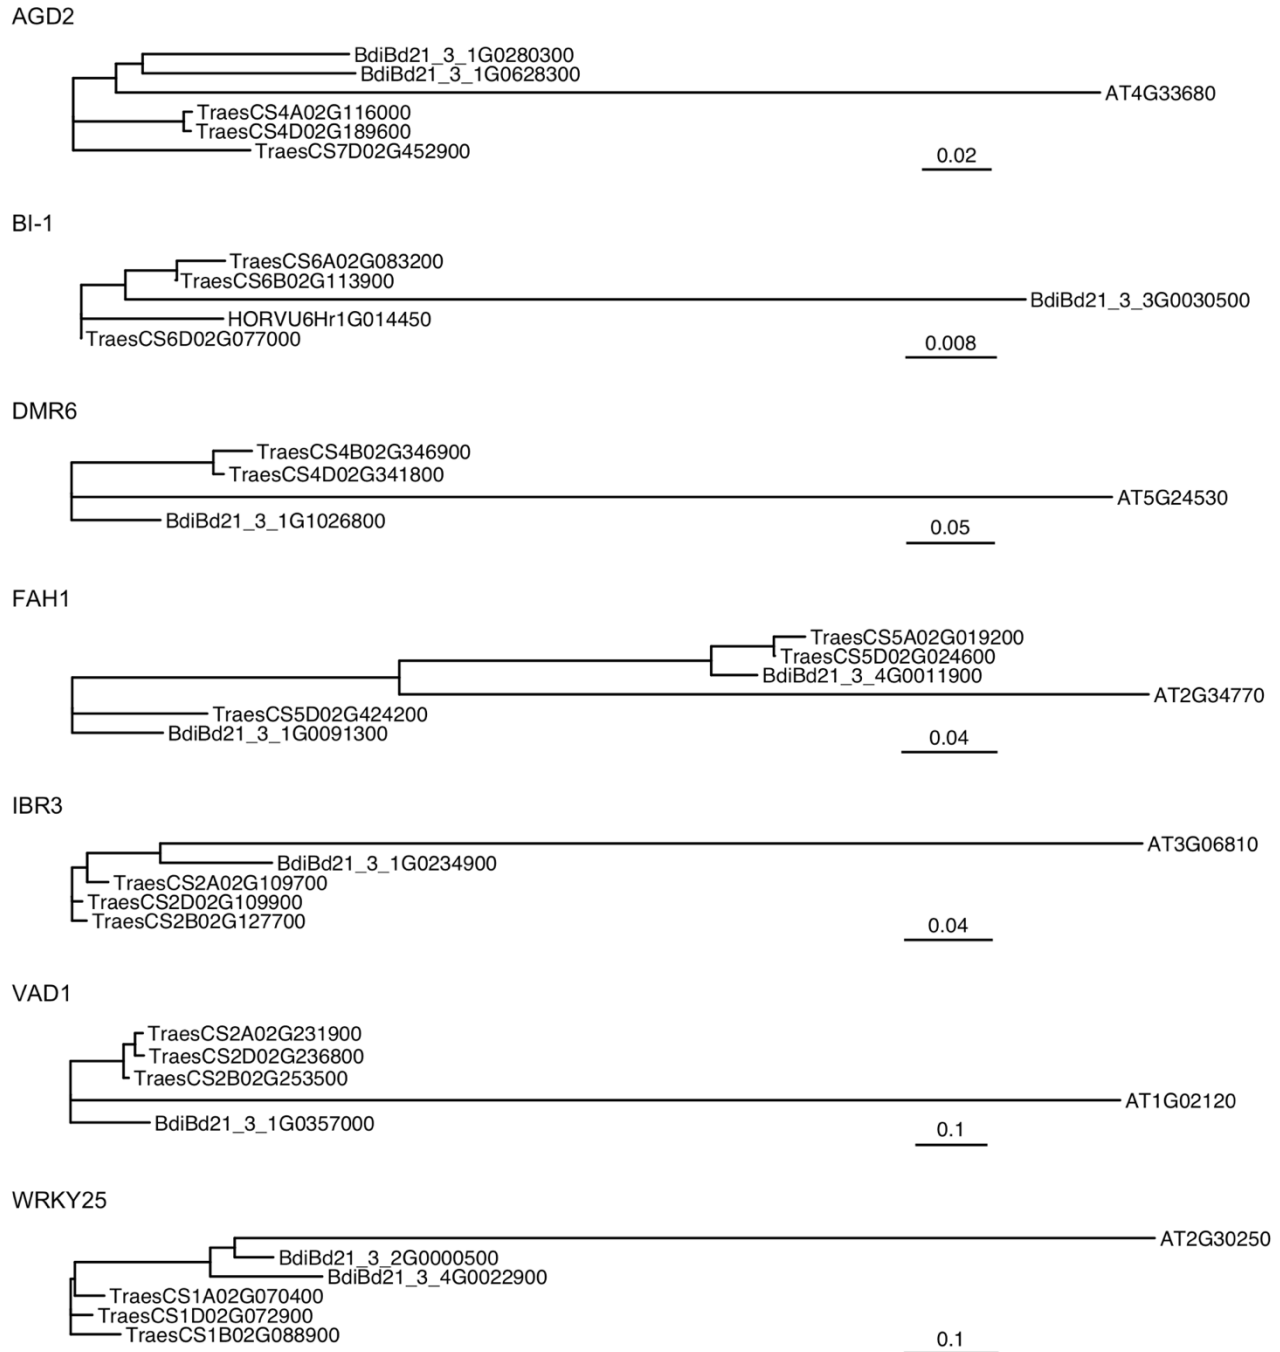

955

956

957 **Supplementary Figure 2.** Molecular phylogenetic analysis of amino acid sequences of orthologous  
958 genes for five of the six S genes of interest. The orthogroup for DND1 only included three genes  
959 (One *A. thaliana* susceptibility gene, one *T. aestivum* ortholog, and one *B. distachyon* ortholog) and  
960 so no phylogenetic tree was generated. Scale bars represent nucleotide substitutions per site.

# Wheat stem rust susceptibility

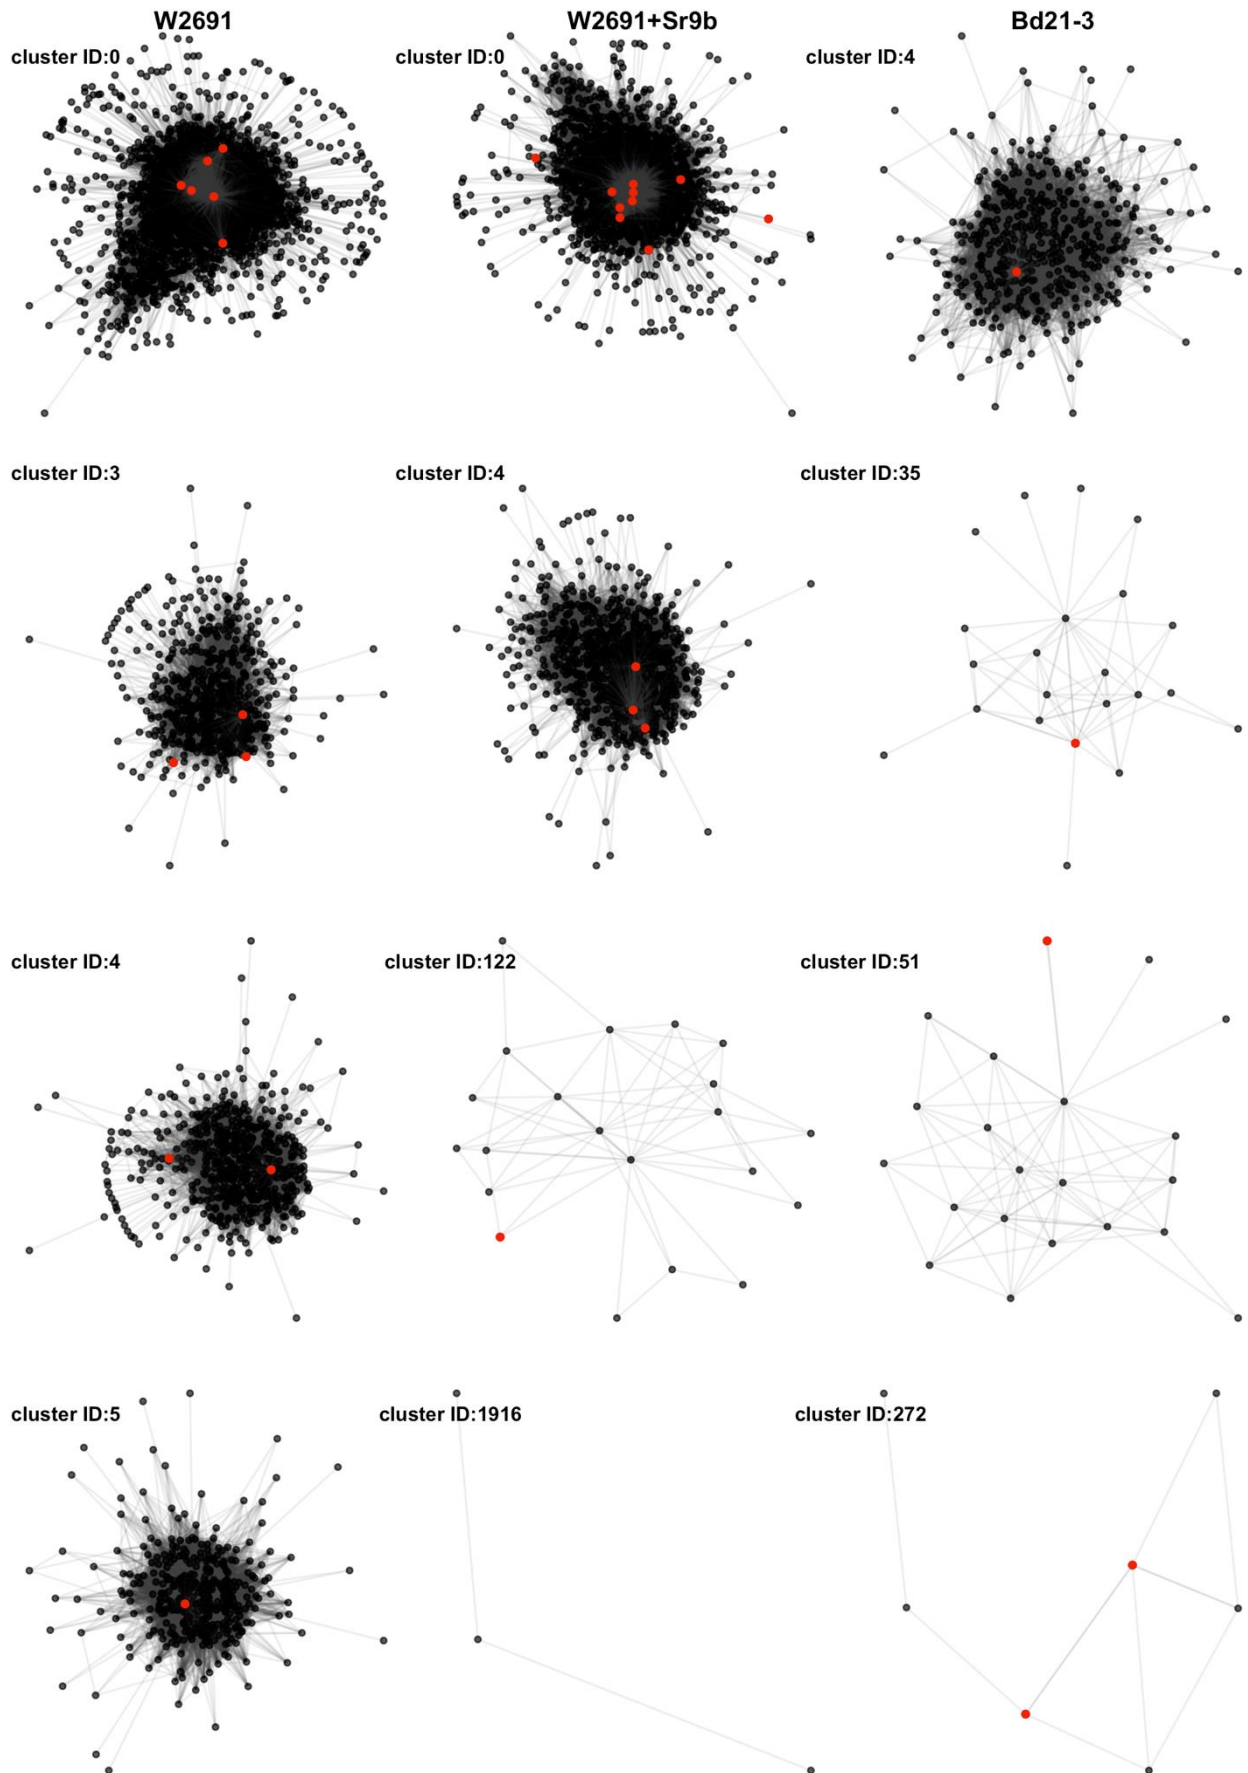

# Wheat stem rust susceptibility

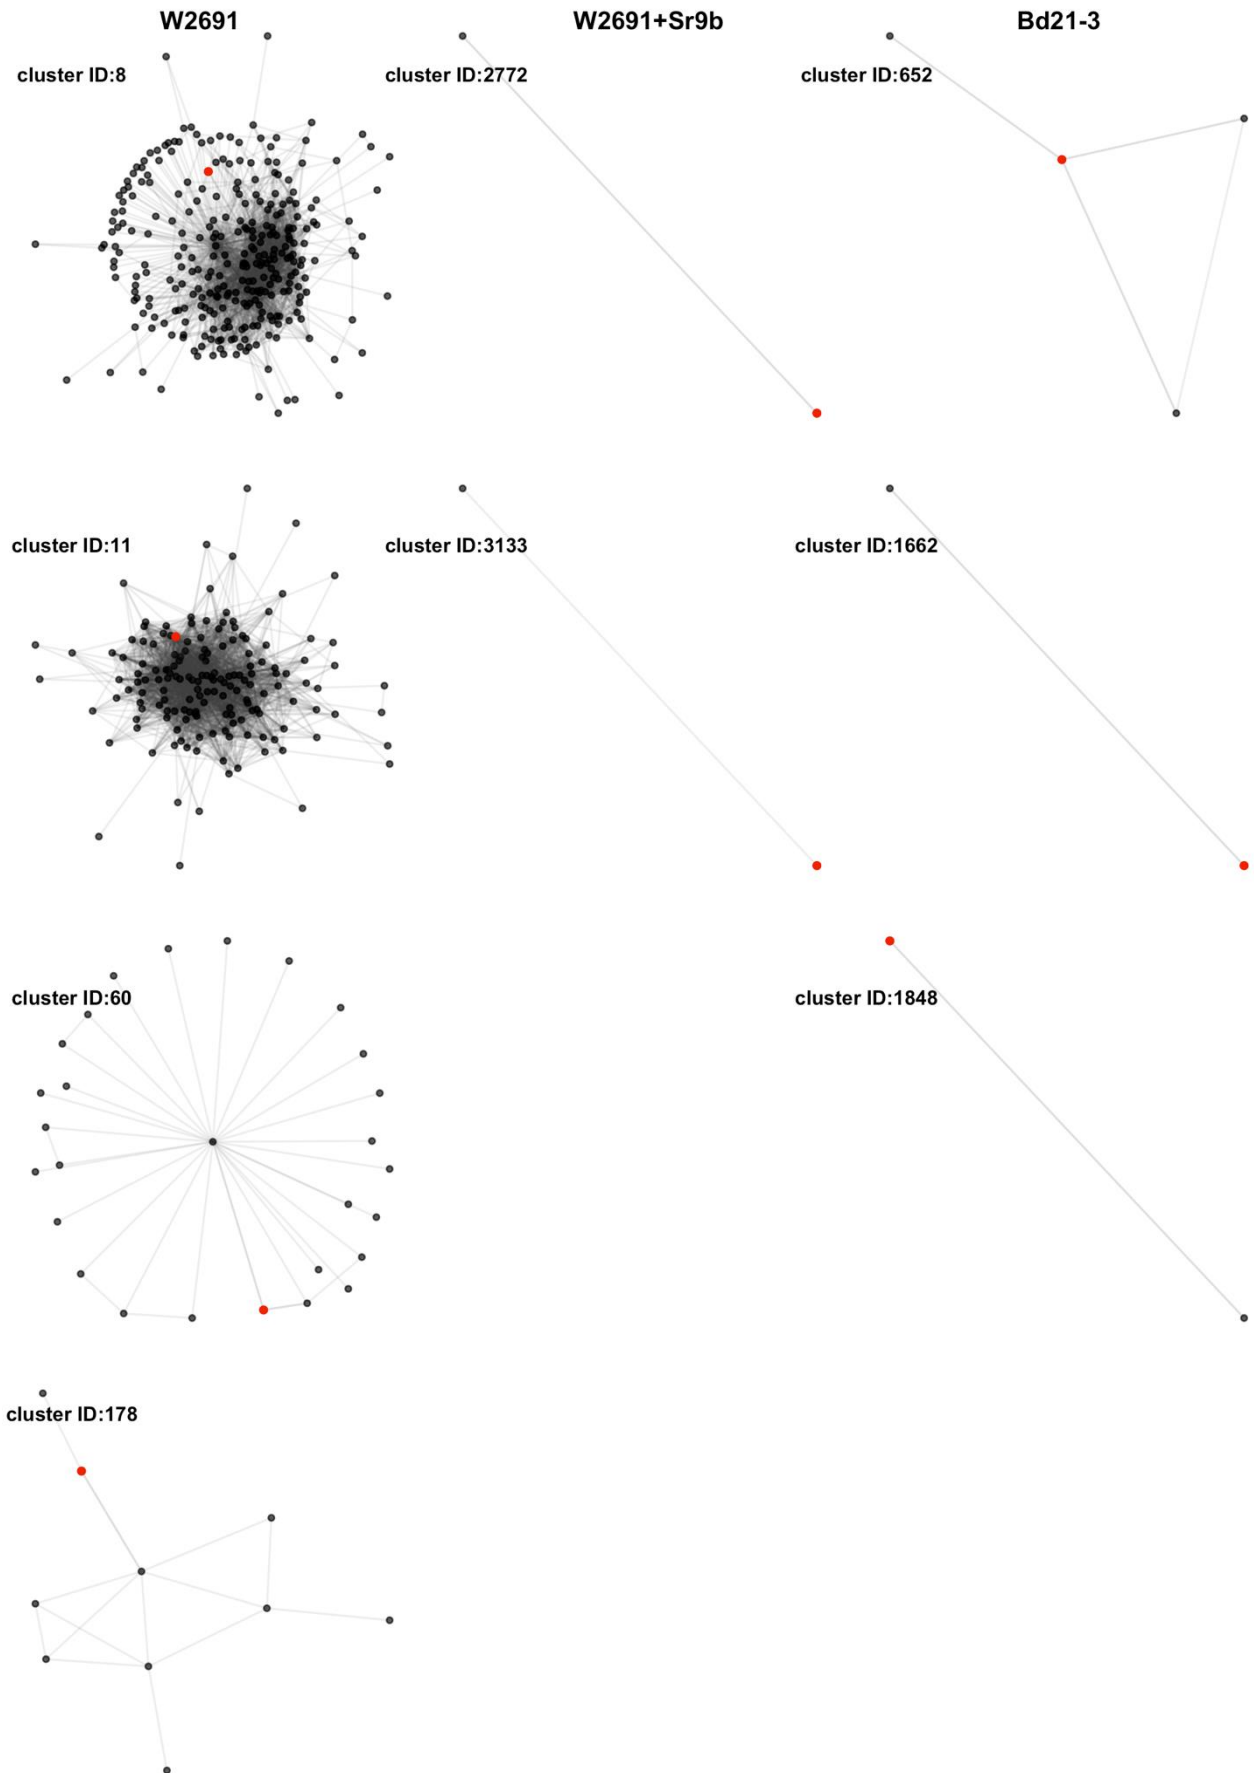

## Wheat stem rust susceptibility

963 **Supplementary Figure 3.** All clusters (nodes > 1) containing a *T. aestivum* or *B. distachyon* ortholog  
964 of the eight susceptibility candidates. Red points represent *T. aestivum* and *B. distachyon* orthologs of  
965 *S* genes. Gene IDs of members in co-expression clusters are presented in Table S9.

966

967

## 968 **Supplementary Tables**

969 **Table S1.** RNA-seq reads, NCBI accession numbers and mapping statistics (excel file).

970 **Table S2.** Enriched GO terms (Observed count over expected count) among up- and down-regulated  
971 genes at three time points across the two *T. aestivum* genotypes and *B. distachyon* Bd21-3.

972 **Table S3.** List of candidate susceptibility genes and orthogroups (excel file).

973 **Table S4.** List of orthogroups containing two or more genes including gene IDs (excel file).

974 **Table S5.** List of singleton orthogroups and gene IDs (excel file).

975 **Table S6.** Average gene expression (FPKM), orthogroup, GO terms, and cluster numbers associated  
976 with all genes in W2691, W2691+*Sr9b*, Bd21-3 (excel file).

977 **Table S7.** Average gene expression (FPKM), orthogroup, GO terms, and cluster numbers associated  
978 with eight *S* gene candidates in W2691, W2691+*Sr9b*, Bd21-3 (excel file).

979 **Table S8.** Co-expression network data for W2691, W2691+*Sr9b*, Bd21-3 genotypes using the mock  
980 and infected RNA-seq data (text file).

981 Available at [https://github.com/henni164/stem\\_rust\\_susceptibility](https://github.com/henni164/stem_rust_susceptibility)

982 **Table S9.** Co-expression network data for clusters containing *S* gene candidates (text file).

983 Available at [https://github.com/henni164/stem\\_rust\\_susceptibility](https://github.com/henni164/stem_rust_susceptibility)

984
